## **Overlapping and specialized roles of tomato phytoene synthase isoforms PSY1 and PSY2 in carotenoid and ABA production**

Miguel EZQUERRO<sup>1,2</sup>, Esteban BURBANO<sup>1</sup>, Manuel RODRIGUEZ-CONCEPCION<sup>1,\*</sup>

1, Institute for Plant Molecular and Cell Biology (IBMCP), CSIC-Universitat Politècnica de València, 46022 Valencia, Spain

2, Centre for Research in Agricultural Genomics (CRAG) CSIC-IRTA-UAB-UB, Campus UAB Bellaterra, 08193 Barcelona, Spain

\*, Corresponding author: [manuelrc@ibmcp.upv.es](mailto:manuelrc@ibmcp.upv.es)

**Running title:** Subfunctionalization of PSY enzymes beyond carotenoids

## 1 **Abstract**

2 Carotenoids are plastidial isoprenoids required for photosynthesis and production of  
3 hormones such as abscisic acid (ABA) in all plants. In tomato (*Solanum lycopersicum*),  
4 carotenoids also provide color to flowers and ripe fruit. Phytoene synthase (PSY)  
5 catalyzes the first and main flux-controlling step of the carotenoid pathway. Three PSY  
6 isoforms are present in tomato, PSY1 to 3. Mutants have shown that PSY1 is the  
7 isoform providing carotenoids for fruit pigmentation but it is dispensable in  
8 photosynthetic tissues. No mutants are available for PSY2 or PSY3, but their  
9 expression profiles suggest a main role for PSY2 in leaves and PSY3 in roots. To  
10 further investigate isoform specialization with genetic tools, we created tomato edited  
11 lines defective in PSY1 and PSY2 in the MicroTom background. The albino phenotype  
12 of lines lacking both PSY1 and PSY2 confirmed that PSY3 does not contribute to  
13 carotenoid biosynthesis in shoot tissues. Our work further shows that carotenoid  
14 production in tomato shoots relies on both PSY1 and PSY2 but with different  
15 contributions in different tissues. PSY2 is the main isoform for carotenoid biosynthesis  
16 in leaf chloroplasts, but the supporting role of PSY1 is particularly important under high  
17 light. PSY2 also contributes to the production of carotenoids in flower petals and, to a  
18 lower extent, fruit chromoplasts. Most interestingly, our results demonstrate that fruit  
19 growth and ripening is controlled by ABA produced in the pericarp from PSY1-derived  
20 precursors whereas PSY2 provides precursors for ABA synthesis in seeds to control  
21 germination.

22

## 23 **Introduction**

24 Carotenoids are a group of isoprenoid molecules synthesized by all photosynthetic  
25 organisms and some non-photosynthetic bacteria and fungi (Rodriguez-Concepcion et  
26 al., 2018; Sun et al., 2018). Carotenoids are essential micronutrients in our diet as  
27 precursors of retinoids such as vitamin A. Their characteristic colors in the range of  
28 yellow to orange and red also make them economically relevant as natural pigments in  
29 the chemical, pharma and agrofood industry. In plants, carotenoids are essential for  
30 photosynthesis (by contributing to the assembly of the photosynthetic apparatus and by  
31 participating in light harvesting) and for photoprotection (by dissipating the excess of  
32 light energy as heat and by scavenging free radicals). They also provide color to some  
33 non-photosynthetic tissues such as flower petals and ripe fruit to attract animals for  
34 pollination and seed dispersal. Besides, carotenoids are precursors of the  
35 phytohormones abscisic acid (ABA) and strigolactones (SL) and other biologically

36 active signals involved in plastid-to-nucleus communication (e.g., beta-cyclocitral) and  
37 environmental interactions (e.g., apocarotenoids modulating root mycorrhization),  
38 among other processes (Moreno et al., 2021; Sun et al., 2018).

39 Carotenoids in plants are produced in plastids from geranylgeranyl diphosphate  
40 (GGPP) produced by the methylerythritol 4-phosphate (MEP) pathway (Fig. 1). GGPP  
41 is also used to produce other essential isoprenoids in the plastid, including  
42 plastoquinone, phyloquinone, tocopherols and chlorophylls (Rodriguez-Concepcion et  
43 al., 2018). The first committed step of carotenoid biosynthesis is the condensation of  
44 two GGPP molecules to produce phytoene (Fig. 1A). This step is catalyzed by  
45 phytoene synthase (PSY), the main flux-controlling enzyme of the carotenoid pathway  
46 (Cao et al., 2019; Zhou et al., 2022). Several desaturation and isomerization steps  
47 convert uncolored phytoene into red lycopene. From lycopene, carotenoid synthesis  
48 branches out depending on the type of cyclization of the ends of the lycopene carbon  
49 chain. The production of two  $\beta$  rings at the two ends of the chain produces  $\beta$ -carotene  
50 ( $\beta,\beta$  branch) while the production of one  $\beta$  ring and one  $\epsilon$  ring produces  $\alpha$ -carotene ( $\beta,\epsilon$   
51 branch). Oxygenation of the rings of carotenes produces xanthophylls such as  
52 violaxanthin and neoxanthin ( $\beta,\beta$  branch) or lutein ( $\beta,\epsilon$  branch) (Fig. 1).

53 Tomato (*Solanum lycopersicum*) is a very well-suited model system to study carotenoid  
54 biosynthesis. Like all plants, tomato produces carotenoids for photosynthesis and  
55 photoprotection in chloroplasts and uses them as precursors to produce ABA and SLs  
56 in photosynthetic and non-photosynthetic tissues. But unlike Arabidopsis (*Arabidopsis*  
57 *thaliana*) and other plant models, tomato accumulates high levels of carotenoids in  
58 specialized plastids named chromoplasts, which are present in flower petals and ripe  
59 fruit. Also different from Arabidopsis, which only has a single PSY (At5g17230), the  
60 tomato genome harbors three PSY-encoding genes: *PSY1* (Solyc03g031860), *PSY2*  
61 (Solyc02g081330), and *PSY3* (Solyc01g005940) (Giorio et al., 2008; Stauder et al.,  
62 2018). While *PSY1* and *PSY2* are similar proteins that share conserved sequences and  
63 have a common origin (Cao et al., 2019; Giorio et al., 2008), *PSY3* belongs to a  
64 different widespread clade restricted to dicots (Stauder et al., 2018). Tomato lines  
65 defective in *PSY1* have been reported as *yellow-flesh* (*r*) mutants (Fray and Grierson  
66 1993; Kachanovsky et al., 2012; Kang et al., 2014; Karniel et al., 2022), silenced lines  
67 (Bird et al., 1991; Bramley et al., 1992.; Fantini et al., 2013; Fraser et al., 1999) and  
68 CRISPR-Cas9-edited lines (D'Ambrosio et al., 2018), but lines impaired in *PSY2* or  
69 *PSY3* have not been described yet. Based on gene expression data and phenotypic  
70 features of *PSY1*-defective lines, it was proposed that *PSY3* function might be  
71 restricted to roots whereas *PSY1* and *PSY2* differentially support carotenogenesis in

72 shoot tissues: PSY1 for pigmentation in chromoplasts and PSY2 for photosynthesis in  
73 chloroplasts (Fraser et al., 1999; Giorio et al., 2008; Hirschberg 2001; Stauder et al.,  
74 2018). However, other sources of evidence suggest that isoform specialization is not  
75 complete. For example, the low but statistically significant upregulation of *PSY1* during  
76 seedling de-etiolation (when carotenoids are essential for the proper assembly of the  
77 photosynthetic apparatus and for photoprotection) and the high levels of *PSY2*  
78 transcripts in flower petals (where accumulation of xanthophylls is responsible for their  
79 characteristic yellow color) allows to hypothesize that both isoforms might participate in  
80 carotenoid biosynthesis in chloroplasts and chromoplasts (Barja et al., 2021; Giorio et  
81 al., 2008). To genetically test this hypothesis, we created tomato edited lines defective  
82 in *PSY1* and *PSY2* in the same tomato background (MicroTom, a widely used  
83 accession in molecular biology labs all over the world) and compared their  
84 physiological and metabolic phenotypes. The albino phenotype of lines defective in  
85 both *PSY1* and *PSY2* confirmed that *PSY3* does not contribute to carotenoid  
86 biosynthesis in shoot tissues. Our work further confirmed that *PSY2* is the main isoform  
87 supporting chloroplast carotenoid biosynthesis but uncovered a supporting role for  
88 *PSY1* under conditions requiring an extra supply of carotenoids such as high light  
89 exposure. *PSY1* was confirmed to be the main isoform in charge of phytoene  
90 production for carotenoid pigments in the chromoplasts of flower petals and fruit  
91 pericarp. Most interestingly, lower carotenoid levels resulted in a preferential reduction  
92 of ABA levels in the fruit pericarp but not in the seeds of the *psy1* mutant, whereas loss  
93 of *PSY2* caused a major reduction of ABA in seeds. This differential ABA decrease in  
94 *psy1* and *psy2* mutants allowed to establish a specific contribution of pericarp ABA to  
95 fruit growth and ripening and seed ABA to seed germination.

96

## 97 **Results**

### 98 **Loss of both *PSY1* and *PSY2* causes an albino-lethal phenotype**

99 To generate plants defective in *PSY1* or/and *PSY2* in the MicroTom background, we  
100 designed one single guide RNA (sgRNA) annealing on the start of the first translated  
101 exon for each gene using the online tool CRISPR-P 2.0 (Liu et al., 2017). Two  
102 independent alleles with premature translation stop codons were selected for each  
103 gene and named *psy1-1*, *psy1-2*, *psy2-1* and *psy2-2* (Fig. 1B and Fig. S1-S3). For  
104 subsequent experiments we selected homozygous lines of each allele without the  
105 Cas9-encoding transgene. In the case of *psy1-1* and *psy1-2* alleles, we observed paler  
106 yellow flowers and pale orange fruits (Fig. S4), which are previously described

107 phenotypes of *r* tomato lines, hence confirming that both were true PSY1-defective  
108 mutants. No distinctive phenotype was observed in the case of *psy2-1* and *psy2-2*  
109 lines. Analysis of transcript levels in fruits by RT-qPCR showed that loss of one of the  
110 isoforms did not influence the expression of the remaining genes (Fig. S4).

111 To assess the impact of simultaneous disruption of PSY1 and PSY2, we crossed lines  
112 defective in PSY1 (*psy1-2*, as female) and PSY2 (*psy2-1*, as male). Double  
113 heterozygous  $F_1$  plants with normal yellow flowers and red fruits were obtained and  
114 allowed to self-pollinate. Among the segregating  $F_2$  population we found several albino  
115 seedlings with a Mendelian proportion (1/16) consistent with this phenotype being the  
116 result of the loss of both PSY1 and PSY2 in double mutant individuals (Fig. 1C). The  
117 rest of the seedlings of the  $F_2$  population displayed a normal green phenotype  
118 indistinguishable from the MicroTom wild-type (WT). PCR-based genotyping of several  
119 individuals (Fig. S5) confirmed that green seedlings showed at least one WT copy of  
120 either *PSY1* or *PSY2* whereas all albino seedlings were double homozygous mutants.  
121 These results indicate that both PSY1 and PSY2 (but not PSY3) are essential for the  
122 production of carotenoids supporting seedling establishment and photosynthetic shoot  
123 development. Consistently, *PSY3* transcripts are hardly detectable in shoot tissues  
124 whereas *PSY1* and *PSY2* transcripts are abundant in all tissues of the tomato plant  
125 (Barja et al., 2021; Giorio et al., 2008; Stauder et al. 2018) (Fig. S6).

126

### 127 **PSY2 is supported by PSY1 to produce carotenoids for photoprotection in leaves**

128 To test whether carotenoid levels were reduced in leaves of single *psy1* and *psy2*  
129 mutant lines, we collected young emerging leaves from plants grown for 18 days under  
130 long-day conditions in the greenhouse and used them for HPLC analysis of carotenoids  
131 and chlorophylls (Fig. 2). Despite WT and mutant plants were phenotypically identical  
132 (Fig. 2A), a slight reduction in carotenoid levels was detected in mutant leaves  
133 compared to WT controls (Fig. 2B). Chlorophylls were not as reduced as carotenoids  
134 (Fig. 2B). These results suggest that both PSY1 and PSY2 can produce carotenoids in  
135 chloroplasts under normal growth conditions, as the loss of one of the isoforms can be  
136 similarly rescued by the activity of the remaining isoform. Most interestingly,  
137 photosynthetic performance was only significantly reduced in *psy2* mutant alleles, as  
138 estimated from effective quantum yield of photosystem II ( $\Phi_{PSII}$ ) measurements (Fig.  
139 2C).

140 The main role of carotenoids in photosynthetic organs such as leaves is  
141 photoprotection against photooxidative damage associated to intense light. In

142 particular, carotenoids can dissipate the excess of light energy as heat through a  
143 process known as non-photochemical quenching (NPQ). Consistent with this essential  
144 function of leaf carotenoids, when 10-day-old tomato plants grown under normal light  
145 (NL) conditions ( $50 \mu\text{mol photons m}^{-2} \text{s}^{-1}$ ) were transferred to high light (HL) conditions  
146 ( $300 \mu\text{mol photons m}^{-2} \text{s}^{-1}$ ) for 5 days, expression of genes encoding PSY1 and PSY2  
147 and concomitant production of carotenoids were up-regulated compared to control  
148 plants transferred for the same time to NL (Fig. 3). *PSY3* transcripts were undetectable  
149 in leaves from NL or HL samples (Fig. 3A), whereas chlorophylls remained virtually  
150 unchanged (Fig. 3B). The increase in carotenoid levels associated to HL exposure of  
151 WT plants was significantly repressed in *psy2* mutants and attenuated in *psy1* mutants  
152 (Fig. 3B). The potential photosynthetic capacity estimated from the measurement of the  
153 maximum quantum yield of photosystem II (Fv/Fm) was reduced in leaves from the two  
154 *psy2* alleles under normal conditions (Fig. 3C), similar to that observed for  $\Phi\text{PSII}$  (Fig.  
155 2C). Upon transfer from NL to HL, Fv/Fm progressively decreased in both WT and  
156 PSY-defective mutants, but the drop was stronger in *psy1* mutants and highest in *psy2*  
157 alleles (Fig. 3C). NPQ was also reduced in HL-exposed *psy1* and *psy2* mutants  
158 compared to WT controls, with *psy2* plants showing lower values than *psy1* alleles (Fig.  
159 3D). These results suggest a main role for PSY2 and a supporting role for PSY1 in  
160 supplying phytoene when enhanced carotenoid synthesis is needed for  
161 photoprotection.

162

### 163 **PSY1 is supported by PSY2 to produce carotenoids for flower and fruit** 164 **pigmentation**

165 Besides their essential role in chloroplasts, carotenoids accumulate in specialized  
166 plastids named chromoplasts that provide distinctive yellow, orange and red colors to  
167 non-photosynthetic tissues such as flower petals and ripe fruit. In tomato, carotenoids  
168 (mainly conjugated xanthophylls) are responsible for the yellow color of flower petals  
169 (Fig. 4) (Ariizumi et al., 2014). As previously reported for PSY1-defective lines (Bird et  
170 al., 1991; Bramley et al., 1992; Fraser et al., 1999), *psy1-1* and *psy1-2* alleles showed  
171 flowers of a paler yellow color than the WT (Fig. 4A and Fig. S4). HPLC analysis of free  
172 and conjugated xanthophyll content showed a reduction of about 50% in PSY1-  
173 defective compared to WT corollas (Fig. 4B). While the absence of *PSY3* transcripts in  
174 flowers (Fig. S6) suggests that PSY2 feeds the production of the carotenoids detected  
175 in PSY1-defective fruit, a reduction of PSY2 activity in *psy1-2* mutants with the *psy2-1*  
176 mutation in heterozygosis, herein referred to as *psy1 PSY2(+/-)*, resulted in only a  
177 marginal reduction in carotenoid levels compared to *psy1-2* flowers (Fig. 4B). Both



178 *psy2-1* and *psy2-2* mutant alleles showed normal-looking flowers (Fig. 4A) with a  
179 virtually WT carotenoid profile (Fig. 4B), but carotenoid levels were slightly reduced in  
180 flowers of *psy2 PSY1(+/-)* plants with only one *PSY1* gene copy in a *psy2-1*  
181 background (Fig. 4B). We therefore conclude that an excess of PSY1 activity ensures  
182 enough carotenoid production in tomato flower corollas.

183 The most characteristic phenotype of PSY1-defective tomato lines is the yellow color of  
184 the ripe fruit (Bird et al. 1991; D'Ambrosio et al., 2018; Fraser et al., 1999; Fray &  
185 Grierson, 1993; Gupta et al., 2022; Kachanovsky et al., 2012; Kang et al., 2014; Karniel  
186 et al., 2022). Tomato fruit ripening is a carotenoid-demanding process as great  
187 amounts of lycopene and, to a lower extent,  $\beta$ -carotene are produced to provide the  
188 characteristic red and orange color to the ripe fruit flesh: the pericarp (Fig. 5). Besides  
189 carotenoid synthesis, ripening also involves degradation of chlorophylls after the fruit  
190 reaches its final size at the mature green (MG) stage, which changes the fruit color  
191 from the breaker (B) stage (Fig. 5A). Previous reports have shown that loss of PSY1  
192 activity does not impact carotenoid levels at the MG stage but it results in a drastic  
193 reduction in pericarp carotenoid levels in ripe fruit, which show a yellowish color due to  
194 flavonoid compounds such as naringenin chalcone (D'Ambrosio et al., 2018; Fraser et  
195 al., 1999; Fray & Grierson, 1993; Kachanovsky et al., 2012; Kang et al., 2014).  
196 Consistently, our edited lines with reduced PSY1 levels showed WT carotenoid and  
197 chlorophyll levels in the pericarp of MG fruit (Fig. 5B). Also as expected, analysis of  
198 pericarp carotenoid contents at six days after the B stage (B+6) showed extremely low  
199 (but still detectable) levels of carotenoids (lutein and  $\beta$ -carotene) in PSY1-defective fruit  
200 (Fig. 5C). To investigate the contribution of PSY2 to the residual carotenoid contents of  
201 B+6 (i.e. ripe) fruit with a complete loss of PSY1, we compared the carotenoid profile of  
202 *psy1-2* and *psy1 PSY2(+/-)* fruit. A reduction in total carotenoids was observed in *psy1-*  
203 *2 PSY2(+/-)* relative to *psy1-2* fruit (Fig. 5C) but it was only statistically significant for  $\beta$ -  
204 carotene. In agreement with the conclusion that PSY1 is by far the main contributor to  
205 carotenoid production in the pericarp of ripe fruit, complete loss of PSY2 in single *psy2-*  
206 *1* mutant fruit had no impact in carotenoid levels compared to WT fruit whereas a  
207 statistically significant reduction of pigment contents was found when PSY1 activity  
208 was genetically reduced in *psy2 PSY1(+/-)* fruit (Fig. 5C).

209 After the B stage, our *psy1-2* and *psy1 PSY2(+/-)* fruits acquired a distinctive yellowish  
210 color but PSY2-defective *psy2-1* and *psy2 PSY1(+/-)* fruits were undistinguishable from  
211 WT fruits (Fig. 5A). Color analysis using TomatoAnalyzer showed that color changes in  
212 *psy2-1* and *psy2-2* fruits occurred at a similar rate as in WT controls (Fig. 6A). To test  
213 whether mutant fruit showed other ripening-associated phenotypes besides color, the

214 expression of ripening marker genes such as *E8* (Solyc09g089580) and *ACS2*  
215 (Solyc01g095080) was quantified by RT-qPCR (Barja et al., 2021). As shown in Fig.  
216 6B, the expression profile of these genes was very similar in WT and *psy2-1* fruit during  
217 ripening. By contrast, the peak of *E8* and *ACS2* expression observed at the B stage  
218 was significantly reduced in *psy1-2* fruit (Fig. 6B).

219

## 220 **PSY1 and PSY2 are major contributors to ABA synthesis in tomato fruit pericarp** 221 **and seeds, respectively**

222 ABA is a carotenoid-derived phytohormone (Fig. 1A) which, besides regulating plant  
223 adaptation to abiotic stress conditions and promoting seed dormancy, appears to  
224 regulate fruit growth and development in tomato (Leng et al., 2014; Nambara & Marion-  
225 Poll, 2005; Zhang et al., 2009). Indeed, reduced hormone levels in mutants defective in  
226 ABA biosynthetic genes such as *notabilis* (*NOT/NCED*), *sitiens* (*SIT/AAO3*), and *flacca*  
227 (*FLC/ABA3*) are associated to slower ripening but also to reduced fruit size and  
228 accelerated seed germination (De Castro & Hilhorst 2006; Galpaz et al., 2008; Groot &  
229 Karssen, 1992; McQuinn et al., 2020; Nitsch et al., 2012). ABA levels in pericarp and  
230 seeds peak around the B stage, preceding the burst of ethylene biosynthesis that  
231 regulates many aspects of the ripening process in a climacteric fruit such as tomato  
232 (Berry & Bewley 1992; De Castro & Hilhorst 2006; Diretto et al., 2020; Zhang et al.,  
233 2009). Quantification of ABA in pericarp and seed samples from WT and mutant fruit  
234 at the B stage showed decreased levels of the hormone in the pericarp of *psy1-2* fruit  
235 and the seeds of *psy2-1* samples (Fig. 7). Consistent with the decrease in pericarp  
236 ABA levels, fruits lacking PSY1 not only showed a reduced peak of ripening-related  
237 gene expression (Fig. 6B) but also lower fruit weight and volume compared to WT and  
238 PSY2-defective fruits (Fig. 6C). We also analyzed the germination (root emergence) of  
239 WT and mutant seeds freshly collected from ripe fruits. Accordingly to the reduced  
240 levels of ABA in the seeds of PSY2-defective mutants (Fig. 7), *psy2-1* seeds showed  
241 an accelerated germination compared to WT and *psy1-2* seeds (Fig. 6D).

242 The described data suggest that PSY1 might be most important for ABA production in  
243 the pericarp and PSY2 in seeds. This conclusion is only partially consistent with  
244 transcript abundance profiles during fruit pericarp and seed development (Fig. S6-S8).  
245 In the pericarp, *PSY1* is expressed at higher levels than *PSY2* from early stages of fruit  
246 development, and the differences become much more dramatic after the MG stage  
247 (Fig. S6 and S7). In developing seeds, both genes are expressed at similar levels (Fig.  
248 S6 and S8) and yet ABA contents are reduced in the *psy2-1* mutant but not in the *psy1-*



249 1 line when compared to the WT (Fig. 7). As fruits ripe, *PSY1* expression increases  
250 and *PSY2* expression decreases in mature seeds (Fig. S6 and S8), which similar to  
251 developing seeds only show reduced ABA levels when *PSY2* activity is removed (Fig.  
252 7). To provide further evidence on the role of specific *PSY* isoforms in the production of  
253 ABA involved in the control of seed dormancy, we blocked carotenoid production in all  
254 the tissues of MG fruits of WT and mutant fruits using specific inhibitors (Fig. 8).  
255 Specifically, we used the MEP pathway inhibitor fosmidomycin (FSM) and the phytoene  
256 desaturase inhibitor norflurazon (NFZ) (Fig. 1A). WT, *psy1-2* and *psy2-1* fruits were  
257 collected from the plant at the MG stage and injected with one of the inhibitors or a  
258 mock solution (water). After twelve days, WT and *psy2-1* fruits treated with either FSM  
259 or NFZ showed a yellow color identical to that of *psy1-2* fruit treated with mock or  
260 inhibitor solutions (Fig. 8A), confirming that both FSM and NFZ successfully inhibited  
261 carotenoid production, at least in the pericarp. At this point, seeds were collected from  
262 the detached fruits, dried overnight, and immediately used for germination assays (Fig.  
263 8B). In the case of WT and *psy1-2* seeds, germination was accelerated by the  
264 treatment with either FSM or NFZ, suggesting an inhibitor-mediated blockage of  
265 carotenoid and hence downstream ABA production in seeds. By contrast, inhibitor  
266 treatment had no effect on the germination rate of *psy2-1* seeds (Fig. 8B). These  
267 results support the conclusion that seed dormancy is independent of the ABA content  
268 of the fruit pericarp or developing seeds but it is regulated by ABA produced in mature  
269 seeds from *PSY2*-derived carotenoids.

270

## 271 **Discussion**

272 *PSY* catalyzes the first committed and main rate-determining step of the carotenoid  
273 pathway. In most plants, several *PSY* isoforms control the production for carotenoids in  
274 different tissues and in response to developmental or environmental cues that require  
275 an enhanced production of these photoprotective pigments (Zhou et al., 2022). The  
276 presence of three *PSY* isoforms in tomato has been known for a long time, but genetic  
277 evidence on their physiological roles was only available for *PSY1*. Removal of *PSY1*  
278 activity in mutants or silenced lines leads to strongly reduced levels of carotenoid  
279 pigments in ripe fruit and, to a lower extent, in corollas but unchanged carotenoid levels  
280 in green tissues, which led to conclude that *PSY1* is mainly involved in carotenoid  
281 biosynthesis in chromoplasts (Bird et al. 1991; Bramley et al., 1992.; D'Ambrosio et al.,  
282 2018; Fantini et al., 2013; Fraser et al., 1999; Giorio et al., 2008; Kang et al., 2014).  
283 Compared to *PSY1*, *PSY2* expression is higher in leaves and increases more strongly  
284 during seedling deetiolation, supporting the conclusion that *PSY2* might be the main

285 isoform producing phytoene for carotenoids involved in photosynthesis and  
286 photoprotection (Barja et al., 2021; Bartley & Scolnik, 1993; Fraser et al., 1999; Gupta  
287 et al., 2022) (Fig. S6). *PSY3* expression levels are very low in all the tissues compared  
288 to *PSY1* and *PSY2* (Giorio et al., 2008; Stauder et al., 2018) (Fig. S6). Similar to most  
289 members of the *PSY3* clade, tomato *PSY3* expression is highest in roots, where it is  
290 induced during arbuscular mycorrhizal (AM) fungi colonization (Barja et al., 2021;  
291 Stauder et al., 2018; Walter et al., 2015). Based on these expression data, it was  
292 concluded that *PSY3* might have a main role in roots, supplying phytoene to produce  
293 carotenoids and derived SLs and apocarotenoid molecules essential for the  
294 establishment of the AM symbiosis (Baslam et al., 2013; Fester et al., 2002; Ruiz-  
295 Lozano et al., 2016; Stauder et al., 2018). This work aimed to genetically test the  
296 hypothesis that besides the main role of *PSY1* for carotenoid production in flowers and  
297 fruit (chromoplasts), *PSY2* in green tissues (chloroplasts) and *PSY3* in roots  
298 (leucoplasts), tomato *PSY* isoforms might also provide extra phytoene when a sudden  
299 requirement of carotenoid production could not be met by the isoform normally  
300 operating in a particular tissue. The generation of lines defective in *PSY1* and/or *PSY2*  
301 reported here provided strong genetic support to correctly frame this conclusion and it  
302 went a step beyond by unveiling a role for particular *PSY* isoforms in tissue-specific  
303 ABA production.

304 Complete loss of *PSY* activity in *Arabidopsis* results in albino seedlings (Pokhilko et al.,  
305 2015). In *Nicotiana benthamiana* (a closer relative to tomato), several genes encode  
306 *PSY1*, *PSY2* and *PSY3* homologues, but the virus-induced silencing of only those for  
307 *PSY1* and *PSY2* results in leaf bleaching, lower carotenoid levels and reduced  
308 photosynthetic parameters such as  $\Phi_{PSII}$ , Fv/Fm and NPQ (Wang et al., 2021).  
309 Similarly, we observed a seedling-lethal albino phenotype in tomato lines lacking *PSY1*  
310 and *PSY2* but retaining a functional *PSY3* gene (Fig. 1C). This result demonstrates that  
311 *PSY3* is unable to produce enough phytoene to support photosynthetic shoot  
312 development when *PSY1* and *PSY2* activities are missing. Indirectly, the result also  
313 provides genetic evidence supporting a root-restricted role for tomato *PSY3*. In the  
314 shoot, both *PSY1* and *PSY2* appear to provide precursors for carotenoid biosynthesis  
315 in chloroplasts under normal growth conditions (Fig. 2). However, the lower up-  
316 regulation of *PSY1* expression compared to *PSY2* in response to HL (Fig. 3A) together  
317 with the reduced impact of the loss of *PSY1* function on carotenoid levels and  
318 photosynthetic performance (Fig. 2 and 3) supports the model of a predominant role for  
319 *PSY2* and a supporting contribution of *PSY1* to carotenoid biosynthesis in tomato  
320 chloroplasts for photoprotection.

321 Besides chloroplasts, tomato plants accumulate very high levels of carotenoids in the  
322 chromoplasts that develop in flower corollas and ripening fruit pericarp. Loss of PSY1  
323 had a much stronger impact than removing PSY2 on total carotenoid levels of both  
324 tissues. However, the effect in flowers (Fig. 4) was much less dramatic than in fruit  
325 (Fig. 5). Despite *PSY2* is highly expressed in petals (Giorio et al., 2007) (Fig. S6) and  
326 *PSY2* catalytic activity appears to be higher than that of *PSY1* (Cao et al., 2019),  
327 complete absence of *PSY2* had no effect of petal carotenoids (Fig. 4). By contrast, a  
328 50% decrease compared to the WT was observed in *PSY1*-defective corollas (Fig. 4),  
329 suggesting that *PSY2* only produces phytoene for carotenoid synthesis in flower  
330 chromoplasts when *PSY1* activity is missing. A similar conclusion was deduced for  
331 *PSY2* during fruit ripening (Gupta et al., 2022; Karniel et al., 2022). In fruit pericarp  
332 tissues, carotenoid levels were unaffected in mutants defective in *PSY1* and *PSY2* until  
333 the onset of ripening (Fig. 5), supporting our conclusion that loss of one of the two  
334 isoforms can be rescued by the remaining isoform in chloroplasts. As chloroplasts  
335 differentiate into chromoplasts, however, the contribution of *PSY1* to the production of  
336 pericarp carotenoids becomes much more predominant, mainly supported by a  
337 dramatic up-regulation of gene expression (Cao et al., 2019; Giorio et al., 2007) (Fig.  
338 S4 and S6). Without *PSY1*, ripe fruit accumulate a very small amount of carotenoid  
339 pigments (Fig. 5C). These carotenoids (mainly lutein and  $\beta$ -carotene) might be  
340 remnants of the carotenoids present in MG fruits. However, *PSY* activity has been  
341 measured in chromoplasts of *PSY1*-defective fruit (Fraser et al., 1999), and a *PSY2*-  
342 dependent increase in carotenoid synthesis was observed during ripening of *PSY1*-  
343 lacking fruit treated with different inhibitors (Gupta et al., 2022; Karniel et al., 2022). A  
344 role for *PSY2* in the production of  $\beta$ -carotene in pericarp chromoplasts during ripening  
345 can also be deduced from the reduced accumulation of this carotenoid in *psy1*  
346 *PSY2*(+/-) compared to *psy1-2* fruit (Fig. 5C). A similar role distribution has been  
347 recently described in pepper (*Capsicum annuum*), where *PSY1* is the isoform  
348 supporting the bulk of pericarp carotenoid biosynthesis during fruit ripening and *PSY2*  
349 is mainly associated to chloroplast-containing tissues (leaves, stems) but it also  
350 contributes to produce carotenoids in fruit chromoplasts (Jang et al., 2020; Wei et al.,  
351 2021). It has been proposed that recruitment of primary (i.e. photosynthetic)  
352 carotenoids as secondary metabolites for flower and fruit pigmentation likely required  
353 duplication and further subfunctionalization of genes encoding rate-controlling steps,  
354 including *PSY* (Galpaz et al., 2006; Giorio et al., 2008). In tomato, the duplicated  
355 pathway might have been originally employed for flower pigmentation and later for fruit  
356 pigmentation, explaining why all tomato species have yellow flowers but only some  
357 develop fruit chromoplasts (Galpaz et al., 2006; Giorio et al., 2008).

358 Besides providing strong genetic evidence supporting long-standing models on the  
359 subfunctionalization of tomato PSY1 and PSY2 isoforms to feed the carotenoid  
360 pathway in particular tissues, our results have unveiled isoform-specific roles in ABA-  
361 regulated processes in tomato fruit and seeds. Genetic and pharmacological  
362 interference with carotenoid biosynthesis was previously shown to impact ABA-  
363 regulated characters such as fruit size, the onset of fruit ripening and seed dormancy  
364 (Diretto et al., 2020; Galpaz et al., 2008; McQuinn et al., 2020; Zhang et al., 2009).  
365 Also, pharmacological approaches had provided evidence suggesting (but not  
366 demonstrating) that PSY2 might be involved in the production of ABA in tomato fruits  
367 (Gupta et al., 2022), most particularly in seeds (Rodriguez-Concepcion et al. 2001).  
368 Here we showed that in the absence of PSY1, PSY2-derived carotenoids sustain the  
369 production of about 2/3 of the ABA measured in the pericarp of tomato B fruit (Fig. 7).  
370 The 1/3 reduction was sufficient to trigger phenotypes associated to low ABA levels in  
371 *psy1* fruit, including an attenuated expression of ethylene-associated ripening gene  
372 (Fig. 6B) and a lower fruit weight and volume (Fig. 6C), suggesting that a threshold of  
373 ABA is required to support normal fruit growth and ripening. Alternatively, PSY1-  
374 derived carotenoids might be responsible for the production of ABA in specific tissues  
375 or cell compartments causing the observed phenotypes. A differential channeling of  
376 phytoene produced by either PSY1 or PSY2 to produce carotenoids for specific ABA  
377 pools is supported by the seed germination experiments. When PSY2 is not present,  
378 PSY1 still produces about 2/3 of the ABA measured in developing and mature seeds  
379 (Fig. 7) but this relatively high amount of remaining ABA is not enough to prevent a  
380 germination delay phenotype in the *psy2* mutant (Fig. 6D). Furthermore, complete  
381 block of carotenoid (and hence downstream) ABA production in MG fruit with inhibitors  
382 did not exacerbate the seed dormancy phenotype of the *psy2* mutant (Fig. 8B). These  
383 results strongly suggest that only PSY2-derived carotenoids produced after the MG  
384 stage are used to generate the ABA that regulates dormancy in tomato seeds.  
385 Following an initial phase of tissue differentiation, tomato seed development proceeds  
386 as fruit expand with a second phase that includes the accumulation of nutrient reserves  
387 and the acquisition of germination and desiccation tolerance (De Castro & Hilhorst  
388 2006) (Fig. S8). When fruits reach their final size at the MG stage, seeds achieve show  
389 full germinability. Later, as fruit start to ripe, ABA production peaks and mature seeds  
390 dry and acquire their dormancy (De Castro & Hilhorst 2006). This transient  
391 accumulation of ABA is mainly supplied by the embryo (Berry & Bewley 1992). Our  
392 results confirm that ABA produced by PSY2 in seeds during ripening regulates seed  
393 dormancy (Fig. 8). Strikingly, the contribution of PSY2 to produce this ABA could not be  
394 predicted based on available expression data. Thus, *PSY2* expression is higher in

395 developing seeds but then it drops from the MG stage in embryonic and other tissues  
396 of mature seeds (Fig. S8). While a *PSY2*-like profile is observed for the *NOT/NCED*  
397 gene (Solyc07g056570), which encodes the first enzyme specific for ABA biosynthesis  
398 (Fig. S8), downstream genes of the pathway such as *SIT/AAO3* (Solyc01g009230) and  
399 *FLC/ABA3* (Solyc07g066480) are more highly expressed in mature seeds (including  
400 embryos) (Fig. S8). Although *PSY1* expression is also higher in mature seeds, little to  
401 no expression was found in embryos. These results clearly illustrate the challenges of  
402 deducing function based only on gene expression profiles.

403 A question arising from our data is how interference with *PSY* activity is specifically  
404 translated into changes in the production of ABA (Fig. 1A and Fig. S8). A possible  
405 scenario would be the existence of metabolons channeling GGPP to ABA in cells from  
406 the pericarp or the seed. GGPP required to produce pericarp carotenoids and ABA  
407 during fruit ripening is mainly supplied by the GGPPS isoform SIG3 with a supporting  
408 contribution of SIG2 (Barja et al., 2021). While SIG2 can interact with both *PSY1* and  
409 *PSY2*, no interaction was reported for SIG3 in transient co-expression assays in *N.*  
410 *benthamiana* leaves (Barja et al., 2021). It is possible that interaction of SIG3 with  
411 particular *PSY* isoforms requires specific partners only found in tomato pericarp (to  
412 interact with *PSY1*) or seed (to interact with *PSY2*) tissues. In agreement with the  
413 existence of metabolons or any other kind of metabolic channeling, the extremely low  
414 *PSY2* activity present in the pericarp of *psy1* fruit appears to be more directly involved  
415 in the production of the  $\beta$ -carotene instead of lutein (Fig. 5C), i.e. it might be  
416 preferentially acting to produce carotenoids that could then be used as precursors for  
417 ABA synthesis (Fig. 1A). However, the channeling of specific pools of carotenoids all  
418 the way to ABA is harder to fit in a metabolon-dependent model due to the large  
419 number of reactions and the diversity of subcellular localizations reported for the  
420 enzymes involved, which include several cytosolic steps following the cleavage of  $\beta$ -  
421 carotene-derived xanthophyll precursors (Nambara & Marion-Poll, 2005) (Fig. 1A and  
422 Fig. S8). Alternatively, expression of specific isoforms in particular tissue microdomains  
423 controlling fruit ripening (directly or indirectly through ethylene), pericarp growth, or  
424 seed dormancy might explain why only *PSY1*-derived ABA appears to contribute to fruit  
425 ripening and only *PSY2*-derived ABA influences seed germination.

426 In summary, we show that both *PSY1* and *PSY2* support carotenoid production in  
427 tomato shoots with diverging contributions in different tissues: *PSY2* > *PSY1* in leaves  
428 (i.e. chloroplasts), *PSY1* > *PSY2* in corollas, and *PSY1* >> *PSY2* in fruit pericarp  
429 tissues. Furthermore, we demonstrate a differential contribution to the production of  
430 ABA of *PSY1* in the pericarp (to regulate fruit growth and ripening) and *PSY2* in the



431 seeds (to control dormancy). Further work should determine the mechanism by which  
432 the production of phytoene by given PSY isoforms is eventually channeled to produce  
433 ABA is particular locations for specific functions.

434

## 435 **Materials and methods**

### 436 **Plant material, treatments and sample collection.**

437 Tomato (*Solanum lycopersicum* var. MicroTom) plants were used for all the  
438 experiments. Seeds were surface-sterilized by a 30 min water wash followed by a 15  
439 min incubation in 10 ml of 40% bleach with 10  $\mu$ l of Tween-20. After three consecutive  
440 10 min washes with sterile milli-Q water, seeds were germinated on plates with solid  
441 0.5x Murashige and Skoog (MS) medium containing 1% agar (without vitamins or  
442 sucrose). The medium was supplemented with kanamycin (100  $\mu$ g/ml) when required  
443 to select transgenic plants. Plates were incubated in a climate-controlled growth  
444 chamber (Ibercex) at 26°C with a photoperiod of 14 h of white light (photon flux density  
445 of 50  $\mu$ mol m<sup>-2</sup> s<sup>-1</sup>) and 10 h of darkness. After 10-14 days, seedlings were transferred  
446 to soil and grown under standard greenhouse conditions (14 h light at 25  $\pm$  1 °C and 10  
447 h dark at 22  $\pm$  1 °C). Young leaves were collected from 4-week-old plants and they  
448 correspond to growing leaflets from the fourth and fifth true leaves. Petal samples were  
449 collected from anthesis flowers. Fruit pericarp samples were collected at different  
450 stages, including mature green (MG, about 30 days post-anthesis), breaker (B, 2-3  
451 days later, when the first symptoms of chlorophyll degradation and carotenoid  
452 accumulation became visually obvious), and several days after breaker. After  
453 collection, samples were immediately frozen in liquid nitrogen and stored at -80°C. For  
454 fruit weight determination, 100 fully ripe individual fruits from each genotype were  
455 collected and weighted one by one using a precision scale (Kern). Fruit volume was  
456 estimated in 10 pools of 10 fruits each by measuring the displaced water volume in a  
457 graduated cylinder. For inhibitor treatments, MG fruits were collected from the plant  
458 and measured to estimate their volume. Then, a Hamilton syringe was used to inject 2-  
459 5  $\mu$ l of sterile water or inhibitor solution into the fruit. The exact volume of fosmidomycin  
460 (FSM, Sigma) or norflurazon (NFZ, Zorial, Syngenta) solution to inject was calculated  
461 based on the fruit volume so the final concentration in the fruits was 200  $\mu$ M FSM or 50  
462  $\mu$ M NFZ. After injection, fruits were kept in a climate-controlled growth chamber at  
463 26°C for 12 days and then seeds were collected and immediately used for germination  
464 assays on 0.5x MS plates. Germination was scored based on root protrusion.

465



#### 466 **Generation of CRISPR-Cas9 mutants and tomato transformation.**

467 For CRISPR-Cas9-mediated disruption of *PSY1* and *PSY2*, one single guide RNA  
468 (sgRNA) was designed for each gene using the online tool CRISPR-P 2.0 (Liu et al.,  
469 2017). Cloning of the CRISPR-Cas9 constructs was carried out as previously described  
470 (Barja et al., 2021) using primers listed in Table S1. As a result, a single final binary  
471 plasmid harboring the Cas9 sequence, the *NPTII* gene providing kanamycin resistance,  
472 and the sgRNAs to disrupt *PSY1* and *PSY2* was obtained and named pDE-PSY1,2  
473 (Table S2). All constructs were confirmed by restriction mapping and DNA sequencing.  
474 *Agrobacterium tumefaciens* GV3101 strain was used to stably transform tomato  
475 MicroTom cotyledons with pDE-PSY1,2 as described (Barja et al., 2021). *In vitro*  
476 regenerated lines showing kanamycin (100 µg/ml) resistance were used for PCR  
477 amplification and sequencing of the genomic sequences. Following further segregation  
478 and PCR-based genotyping using specific primers (Table S1), stable homozygous lines  
479 lacking the Cas9-encoding transgene were obtained and named *psy1-1*, *psy1-2*, *psy2-*  
480 *1* and *psy2-2*. For the generation of double double mutants lacking both PSY1 and  
481 PSY2, *psy1-2* and *psy2-1* homozygous plants were crossed and the segregating F2  
482 offspring was used for PCR-based genotyping of individual plants.

483

#### 484 **Photosynthetic parameters.**

485 Tomato seedlings were germinated and grown for ten days under white light with a  
486 fluorescence photon flux density of 50 µmol m<sup>-2</sup> s<sup>-1</sup> (referred to as normal light, NL) and  
487 then either left under NL or transferred to a chamber with a more intense light of 300  
488 µmol m<sup>-2</sup> s<sup>-1</sup> (referred to as high light, HL) for five more days. Chlorophyll fluorescence  
489 measurements were carried out with a Handy FluorCam (Photon Systems  
490 Instruments). Fv/Fm was measured in seedlings incubated in the dark for 30 min to  
491 allow full relaxation of photosystems. φPSII was measured at 30 PAR with an actinic  
492 light of 3 µmol m<sup>-2</sup> s<sup>-1</sup>. For NPQ measurements, the following steps of actinic irradiance  
493 were used: 0, 5, 10, 20, 55, 110, 185 and 280 µmol photons m<sup>-2</sup> s<sup>-1</sup>.

494

#### 495 **RNA extraction and RT-qPCR analyses.**

496 Total RNA was extracted from tomato freeze-dried tissue using the PureLink RNA MINI  
497 extraction kit (Ambion). RNA was quantified using a NanoDrop™ 8000  
498 spectrophotometer (ThermoFischer Scientific) and checked for integrity by agarose gel  
499 electrophoresis. The Transcriptor First Strand cDNA Synthesis Kit (Nzytech) was used  
500 to reverse transcribe 1 µg of extracted RNA and the generated cDNA volume (20 µl)

501 was subsequently diluted 5-fold with milli-Q water and stored at -20 °C for further  
502 analysis. Transcript abundance was evaluated via real-time quantitative PCR (RT-  
503 qPCR) in a reaction volume of 10 µl containing 2 µl of the cDNA dilution, 5 µl of SYBR  
504 Green Master Mix (Thermo Fisher Scientific), and 0.3 µM of each specific forward and  
505 reverse primer (Table S1). The RT-qPCR was carried out on a QuantStudio 3 Real-  
506 Time PCR System (Thermo Fisher Scientific) using three independent biological  
507 samples and three technical replicates of each sample. Normalized transcript  
508 abundance was calculated as previously described (Simon, 2003) using tomato *ACT4*  
509 (*Solyc04g011500*) as endogenous reference gene.

510

### 511 **Pigment quantification.**

512 Carotenoids and chlorophylls were extracted as described (Barja et al., 2021) with  
513 some modifications. Freeze-dried material from leaves (8 mg) were mixed with 375 µl  
514 of methanol as extraction solvent, 25 µl of a 10 % (w/v) solution of canthaxanthin  
515 (Sigma) in chloroform as internal control, and glass beads. Following steps were  
516 performed as described (Barja et al., 2021). Freeze-dried flower petals and fruit  
517 pericarp tissue (20 mg) were mixed in 2 ml Eppendorf tubes with 1 ml of 2:1:1  
518 hexane:acetone:methanol as extraction solvent, 25 µl of the canthaxanthin solution,  
519 and glass beads. After vortexing the samples, 100 µl of milli-Q water were added to the  
520 mix. Then, samples were shaken for 1 min in a TissueLyser II (Qiagen) and then  
521 centrifuged at 4°C for 5 min at maximum speed in a tabletop microfuge. The organic  
522 phase was transferred to a 1.5 ml tube and the rest was re-extracted with 1 ml of 2:1:1  
523 hexane:acetone:methanol. The organic phases from the two rounds of extraction were  
524 mixed in the same tube and evaporated using a SpeedVac. Extracted pigments were  
525 resuspended in 200 µl of acetone by using an ultrasound bath and filtered with 0.2 µm  
526 filters into amber-colored 2 ml glass vials. Separation and quantification of individual  
527 carotenoids and chlorophylls was performed as described (Barja et al., 2021). Fruit  
528 pigmentation (Average Red Color) was measured in three different tomato fruit  
529 samples of each genotype using the default settings of the TomatoAnalyzer 4.0  
530 software ([https://vanderknaaplab.uga.edu/tomato\\_analyzer.html](https://vanderknaaplab.uga.edu/tomato_analyzer.html)).

531

### 532 **Determination of ABA levels**

533 For ABA extraction, 100 mg of frozen pericarp tissue or seeds were ground with a  
534 mortar and pestle and resuspended in a solution of 80% (v/v) methanol and 1% (v/v)  
535 acetic acid with deuterium-labelled ABA as internal standard. After shaking for 1 h at

536 4°C, the extract was centrifuged at maximum speed in a table top microfuge and the  
537 supernatant was collected and dried in a SpeedVac. The dry residue was dissolved in  
538 1% (v/v) acetic acid and run through a reverse phase column (Oasis HLB) as described  
539 (Seo et al., 2011). The eluate was dissolved in 5% (v/v) acetonitrile and 1% (v/v) acetic  
540 acid and used for UHPLC chromatography with a reverse phase 2.6 µg Accucore RP-  
541 MS column of 100 mm length x 2.1 mm i.d. (ThermoFisher Scientific). The mobile  
542 phase was 5 to 50% (v/v) acetonitrile gradient containing 0.05% (v/v) acetic acid at  
543 400 µl/min over 21 min. Quantification of ABA was performed with a Q-Exactive mass  
544 spectrometer equipped with an Orbitrap detector (ThermoFisher Scientific) by targeted  
545 Selected Ion 100 Monitoring (SIM). The concentrations of ABA in the extracts were  
546 determined using embedded calibration curves and the TraceFinder 4.1 SP1 software.

547

#### 548 **Acknowledgments**

549 We thank M<sup>a</sup> Rosa Rodriguez-Goberna for technical help with HPLC analyses and  
550 Tsuyoshi Nakagawa (Shimane University, Japan) for the Gateway vectors. We also  
551 thank members of our laboratory for helpful discussions. This work was funded by  
552 grants from Spanish MCIN/AEI/10.13039/501100011033 and European  
553 NextGeneration EU/PRTR and PRIMA programs to MR-C (PID2020-115810GB-I00  
554 and UToPIQ-PCI2021-121941). MR-C is also supported by CSIC (202040E299) and  
555 Generalitat Valenciana (PROMETEU/2021/056). ME and EB received predoctoral  
556 fellowships from MCIN/AEI (BES-2017-080652) and Colombia's Doctorado Exterior  
557 program (10852908329), respectively. No conflict of interest is declared.

558

#### 559 **Author contributions**

560 ME and MR-C designed the research; ME and EB conducted the experiments; ME, EB  
561 and MR-C analyzed and discussed data; ME and MR-C wrote the paper.

## **References**

- Ariizumi, T., Kishimoto, S., Kakami, R., Maoka, T., Hirakawa, H., Suzuki, Y., Ozeki, Y., Shirasawa, K., Bernillon, S., Okabe, Y., Moing, A., Asamizu, E., Rothan, C., Ohmiya, A., & Ezura, H. (2014). Identification of the carotenoid modifying gene PALE YELLOW PETAL 1 as an essential factor in xanthophyll esterification and yellow flower pigmentation in tomato (*Solanum lycopersicum*). *Plant Journal*, *79*(3), 453–465. <https://doi.org/10.1111/tbj.12570>
- Barja, M. V., Ezquerro, M., Beretta, S., Diretto, G., Florez-Sarasa, I., Feixes, E., Fiore, A., Karlova, R., Fernie, A. R., Beekwilder, J., & Rodríguez-Concepción, M. (2021). Several geranylgeranyl diphosphate synthase isoforms supply metabolic substrates for carotenoid biosynthesis in tomato. *New Phytologist*, *231*(1), 255–272. <https://doi.org/10.1111/nph.17283>
- Bartley, G. E., & Scolnik, P. A. (1993). cDNA cloning, expression during development, and genome mapping of PSY2, a second tomato gene encoding phytoene synthase. *Journal of Biological Chemistry*, *268*(34), 25718–25721. [https://doi.org/10.1016/s0021-9258\(19\)74448-2](https://doi.org/10.1016/s0021-9258(19)74448-2)
- Baslam, M., Esteban, R., García-Plazaola, J. I., & Goicoechea, N. (2013). Effectiveness of arbuscular mycorrhizal fungi (AMF) for inducing the accumulation of major carotenoids, chlorophylls and tocopherol in green and red leaf lettuces. *Applied Microbiology and Biotechnology*, *97*(7), 3119–3128. <https://doi.org/10.1007/s00253-012-4526-x>
- Berry, T., & Bewley, J.D. (1992) A Role for the Surrounding Fruit Tissues in Preventing the Germination of Tomato (*Lycopersicon esculentum*) Seeds : A Consideration of the Osmotic Environment and Abscisic Acid. *Plant Physiology* *100*(2), 951-957. <https://doi.org/10.1104/pp.100.2.951>
- Bird, C. R., Ray, J. A., Fletcher, J. D., Boniwell, J. M., Bird, A. S., Teulieres, C., Blain I., Bramley, P., & Schuch, W. (1991). Using Antisense RNA to Study Gene Function: Inhibition of Carotenoid Biosynthesis in Transgenic Tomatoes. *Nature Biotechnology* *9*, 635–639. <https://doi.org/10.1038/nbt0791-635>
- Bramley, P., Teulieres, C., Blain, I., Bird, C., Schuch, W., & Holloway, R. (1992). Biochemical characterization of transgenic tomato plants in which carotenoid synthesis has been inhibited through the expression of antisense RNA to pTOM5. In *The Plant Journal* (Vol. 992, Issue 1).
- Cao, H., Luo, H., Yuan, H., Eissa, M. A., Thannhauser, T. W., Welsch, R., Hao, Y. J., Cheng, L., & Li, L. (2019). A neighboring aromatic-aromatic amino acid combination governs activity divergence between tomato phytoene synthases. *Plant Physiology*, *180*(4), 1988–2003. <https://doi.org/10.1104/pp.19.00384>
- D'Ambrosio, C., Stigliani, A. L., & Giorio, G. (2018). CRISPR/Cas9 editing of carotenoid genes in tomato. *Transgenic Research*, *27*(4), 367–378. <https://doi.org/10.1007/s11248-018-0079-9>
- De Castro, R.D. & Hilhorst, H.W.M. (2006). Hormonal control of seed development in GA- and ABA-deficient tomato (*Lycopersicon esculentum* Mill. cv. Moneymaker) mutants. *Plant Science* *170*, 462–70. <https://doi.org/10.1016/j.plantsci.2005.09.014>

- Diretto, G., Frusciante, S., Fabbri, C., Schauer, N., Busta, L., Wang, Z., Matas, A. J., Fiore, A., K.C. Rose, J., Fernie, A. R., Jetter, R., Mattei, B., Giovannoni, J., & Giuliano, G. (2020). Manipulation of  $\beta$ -carotene levels in tomato fruits results in increased ABA content and extended shelf life. *Plant Biotechnology Journal*, *18*(5), 1185–1199. <https://doi.org/10.1111/pbi.13283>
- Fantini, E., Falcone, G., Frusciante, S., Giliberto, L., & Giuliano, G. (2013). Dissection of tomato lycopene biosynthesis through virus-induced gene silencing. *Plant Physiology*, *163*(2), 986–998. <https://doi.org/10.1104/pp.113.224733>
- Fester, T., Schmidt, D., Lohse, S., Walter, M. H., Giuliano, G., Bramley, P. M., Fraser, P. D., Hause, B., & Strack, D. (2002). Stimulation of carotenoid metabolism in arbuscular mycorrhizal roots. *Planta*, *216*(1), 148–154. <https://doi.org/10.1007/s00425-002-0917-z>
- Fraser, P. D., Kiano, J. W., Truesdale, M. R., Schuch, W., & Bramley, P. M. (1999). Phytoene synthase-2 enzyme activity in tomato does not contribute to carotenoid synthesis in ripening fruit. In *Plant Molecular Biology* (Vol. 40).
- Fray, R. G., & Grierson, D. (1993). Identification and genetic analysis of normal and mutant phytoene synthase genes of tomato by sequencing, complementation and co-suppression. In *Plant Molecular Biology* (Vol. 22).
- Galpaz, N., Ronen, G., Khalfa, Z., Zamir, D., & Hirschberg, J. (2006). A chromoplast-specific carotenoid biosynthesis pathway is revealed by cloning of the tomato white-flower locus. *Plant Cell*, *18*(8), 1947–1960. <https://doi.org/10.1105/tpc.105.039966>
- Galpaz, N., Wang, Q., Menda, N., Zamir, D., & Hirschberg, J. (2008). Abscisic acid deficiency in the tomato mutant high-pigment 3 leading to increased plastid number and higher fruit lycopene content. *Plant Journal*, *53*(5), 717–730. <https://doi.org/10.1111/j.1365-313X.2007.03362.x>
- Giorio, G., Stigliani, A. L., & D'Ambrosio, C. (2008). Phytoene synthase genes in tomato (*Solanum lycopersicum* L.) - New data on the structures, the deduced amino acid sequences and the expression patterns. *FEBS Journal*, *275*(3), 527–535. <https://doi.org/10.1111/j.1742-4658.2007.06219>
- Groot, S. P. C., & Karssen, C. M. (1992). Dormancy and Germination of Abscisic Acid-Deficient Tomato Seeds' Studies with the sitiens Mutant. In *Plant Physiol* (Vol. 99). <https://academic.oup.com/plphys/article/99/3/952/6087824>
- Gupta, P., Rodriguez-Franco, M., Bodanapu, R., Sreelakshmi, Y., & Sharma, R. (2022). Phytoene synthase 2 in tomato fruits remains functional and contributes to abscisic acid formation. *Plant Science*, *316*. <https://doi.org/10.1016/j.plantsci.2022.111177>
- Hirschberg J. (2001). Carotenoid biosynthesis in flowering plants. *Curr Opin Plant Biol*.*4*(3):210-8. doi: 10.1016/s1369-5266(00)00163-1.
- Jang, S. J., Jeong, H. B., Jung, A., Kang, M. Y., Kim, S., Ha, S. H., Kwon, J. K., & Kang, B. C. (2020). Phytoene synthase 2 can compensate for the absence of PSY1 in the control of color in Capsicum fruit. *Journal of Experimental Botany*, *71*(12), 3417–3427. <https://doi.org/10.1093/jxb/eraa155>
- Kachanovsky, D. E., Filler, S., Isaacson, T., & Hirschberg, J. (2012). Epistasis in tomato color mutations involves regulation of phytoene synthase 1 expression by



- cis-carotenoids. *Proceedings of the National Academy of Sciences of the United States of America*, 109(46), 19021–19026. <https://doi.org/10.1073/pnas.1214808109>
- Kang, B., Gu, Q., Tian, P., Xiao, L., Cao, H., & Yang, W. (2014). A chimeric transcript containing Psy1 and a potential mRNA is associated with yellow flesh color in tomato accession PI 114490. *Planta*, 240(5), 1011–1021. <https://doi.org/10.1007/s00425-014-2052-z>
- Karniel, U., Adler Berke, N., Mann, V., & Hirschberg, J. (2022). Perturbations in the Carotenoid Biosynthesis Pathway in Tomato Fruit Reactivate the Leaf-Specific Phytoene Synthase 2. *Frontiers in Plant Science*, 13. <https://doi.org/10.3389/fpls.2022.844748>
- Leng, P., Yuan, B., Guo, Y., & Chen, P. (2014). The role of abscisic acid in fruit ripening and responses to abiotic stress. In *Journal of Experimental Botany* (Vol. 65, Issue 16, pp. 4577–4588). Oxford University Press. <https://doi.org/10.1093/jxb/eru204>
- Liu, H., Ding, Y., Zhou, Y., Jin, W., Xie, K., & Chen, L. L. (2017). CRISPR-P 2.0: An Improved CRISPR-Cas9 Tool for Genome Editing in Plants. In *Molecular Plant* (Vol. 10, Issue 3, pp. 530–532). Cell Press. <https://doi.org/10.1016/j.molp.2017.01.003>
- McQuinn, R. P., Gapper, N. E., Gray, A. G., Zhong, S., Tohge, T., Fei, Z., Fernie, A. R., & Giovannoni, J. J. (2020). Manipulation of ZDS in tomato exposes carotenoid- and ABA-specific effects on fruit development and ripening. *Plant Biotechnology Journal*, 18(11), 2210–2224. <https://doi.org/10.1111/pbi.13377>
- Moreno, J. C., Mi, J., Alagoz, Y., & Al-Babili, S. (2021). Plant apocarotenoids: from retrograde signaling to interspecific communication. *Plant Journal*, 105(2), 351–375. <https://doi.org/10.1111/tpj.15102>
- Nambara, E., & Marion-Poll, A. (2005). Abscisic acid biosynthesis and catabolism. In *Annual Review of Plant Biology* (Vol. 56, pp. 165–185). <https://doi.org/10.1146/annurev.arplant.56.032604.144046>
- Nitsch, L., Kohlen, W., Oplaat, C., Charnikhova, T., Cristescu, S., Michieli, P., Wolters-Arts, M., Bouwmeester, H., Mariani, C., Vriezen, W. H., & Rieu, I. (2012). ABA-deficiency results in reduced plant and fruit size in tomato. *Journal of Plant Physiology*, 169(9), 878–883. <https://doi.org/10.1016/j.jplph.2012.02.004>
- Pokhilko, A., Bou-Torrent, J., Pulido, P., Rodríguez-Concepción, M., & Ebenhöf, O. (2015). Mathematical modelling of the diurnal regulation of the MEP pathway in Arabidopsis. *New Phytologist*, 206(3), 1075–1085. <https://doi.org/10.1111/nph.13258>
- Rodríguez-Concepción M, Ahumada I, Diez-Juez E, Sauret-Güeto S, Lois LM, Gallego F, Carretero-Paulet L, Campos N, Boronat A. (2001) 1-Deoxy-D-xylulose 5-phosphate reductoisomerase and plastid isoprenoid biosynthesis during tomato fruit ripening. *Plant J*. Aug;27(3):213-22. doi: 10.1046/j.1365-313x.2001.01089.x. PMID: 11532167.
- Rodríguez-Concepción, M., Avalos, J., Bonet, M. L., Boronat, A., Gomez-Gomez, L., Hornero-Mendez, D., Limon, M. C., Meléndez-Martínez, A. J., Olmedilla-Alonso, B., Palou, A., Ribot, J., Rodrigo, M. J., Zacarias, L., & Zhu, C. (2018). A global perspective on carotenoids: Metabolism, biotechnology, and benefits for nutrition



- and health. In *Progress in Lipid Research* (Vol. 70, pp. 62–93). Elsevier Ltd. <https://doi.org/10.1016/j.plipres.2018.04.004>
- Ruiz-Lozano, J. M., Aroca, R., Zamarreño, Á. M., Molina, S., Andreo-Jiménez, B., Porcel, R., García-Mina, J. M., Ruyter-Spira, C., & López-Ráez, J. A. (2016). Arbuscular mycorrhizal symbiosis induces strigolactone biosynthesis under drought and improves drought tolerance in lettuce and tomato. *Plant Cell and Environment*, 39(2), 441–452. <https://doi.org/10.1111/pce.12631>
- Seo, M., Jikumar, Y. & Kamiya Y. (2011). Profiling of Hormones and Related Metabolites in Seed Dormancy and Germination Studies. *Methods in Molecular Biology* 773, 99–111. [https://doi.org/10.1007/978-1-61779-231-1\\_7](https://doi.org/10.1007/978-1-61779-231-1_7).
- Simon, P. (2003). Q-Gene: Processing quantitative real-time RT-PCR data. *Bioinformatics*, 19(11), 1439–1440. <https://doi.org/10.1093/bioinformatics/btg157>
- Stauder, R., Welsch, R., Camagna, M., Kohlen, W., Balcke, G. U., Tissier, A., & Walter, M. H. (2018). Strigolactone levels in dicot roots are determined by an ancestral symbiosis-regulated clade of the PHYTOENE SYNTHASE gene family. *Frontiers in Plant Science*, 9. <https://doi.org/10.3389/fpls.2018.00255>
- Sun, T., Yuan, H., Cao, H., Yazdani, M., Tadmor, Y., & Li, L. (2018). Carotenoid Metabolism in Plants: The Role of Plastids. In *Molecular Plant* (Vol. 11, Issue 1, pp. 58–74). Cell Press. <https://doi.org/10.1016/j.molp.2017.09.010>
- Walter, M. H., Stauder, R., & Tissier, A. (2015). Evolution of root-specific carotenoid precursor pathways for apocarotenoid signal biogenesis. In *Plant Science* (Vol. 233, pp. 1–10). Elsevier Ireland Ltd. <https://doi.org/10.1016/j.plantsci.2014.12.017>
- Wang, Z., Zhang, L., Dong, C., Guo, J., Jin, L., Wei, P., Li, F., Zhang, X., & Wang, R. (2021). Characterization and functional analysis of phytoene synthase gene family in tobacco. *BMC Plant Biology*, 21(1). <https://doi.org/10.1186/s12870-020-02816-3>
- Wei, X., Meng, C., Yuan, Y., Nath, U. K., Zhao, Y., Wang, Z., Yang, S., Li, L., Niu, L., Yao, Q., Wei, F., & Zhang, X. (2021). CaPSY1 gene plays likely the key role in carotenoid metabolism of pepper (*Capsicum annuum*) at ripening. *Functional Plant Biology*, 48(2), 141–155. <https://doi.org/10.1071/FP19287>
- Zhang, M., Yuan, B., & Leng, P. (2009). The role of ABA in triggering ethylene biosynthesis and ripening of tomato fruit. *Journal of Experimental Botany*, 60(6), 1579–1588. <https://doi.org/10.1093/jxb/erp026>
- Zhou, X., Rao, S., Wrightstone, E., Sun, T., Lui, A. C. W., Welsch, R., & Li, L. (2022). Phytoene Synthase: The Key Rate-Limiting Enzyme of Carotenoid Biosynthesis in Plants. In *Frontiers in Plant Science* (Vol. 13). Frontiers Media S.A. <https://doi.org/10.3389/fpls.2022.884720>

## Figures

**Fig. 1. Carotenoid pathway and tomato mutants. (A)** Carotenoid biosynthesis pathway. Dashed arrows represent multiple steps. The reaction catalyzed by phytoene synthase (PSY) is marked, and steps interrupted by inhibitors fosmidomycin (FSM) and norflurazon (NFZ) are indicated. Each individual carotenoid is represented by the indicated color (circle) in the corresponding plots representing their levels. **(B)** Scheme representing the wild-type PSY1 and PSY2 proteins and the mutant versions generated in the corresponding CRISPR-Cas9-generated alleles (see Fig. S1–S3 for further details). The region targeted by the designed sgRNAs is indicated with a red arrowhead and a dotted line. Orange and purple bars mark the position of conserved domains required for PSY activity (hydrofobic flap and Asp-rich domains, respectively). Green boxes represent plastid transit peptides. Black boxes represent the protein sequence resulting after a frame-shift in the mutants. The large deletion generated in the *psy2-1* allele is shown with a dashed line. **(C)** Representative seven-day-old seedlings of the indicated genotypes resulting from a cross of *psy1-2* and *psy2-1* mutants.

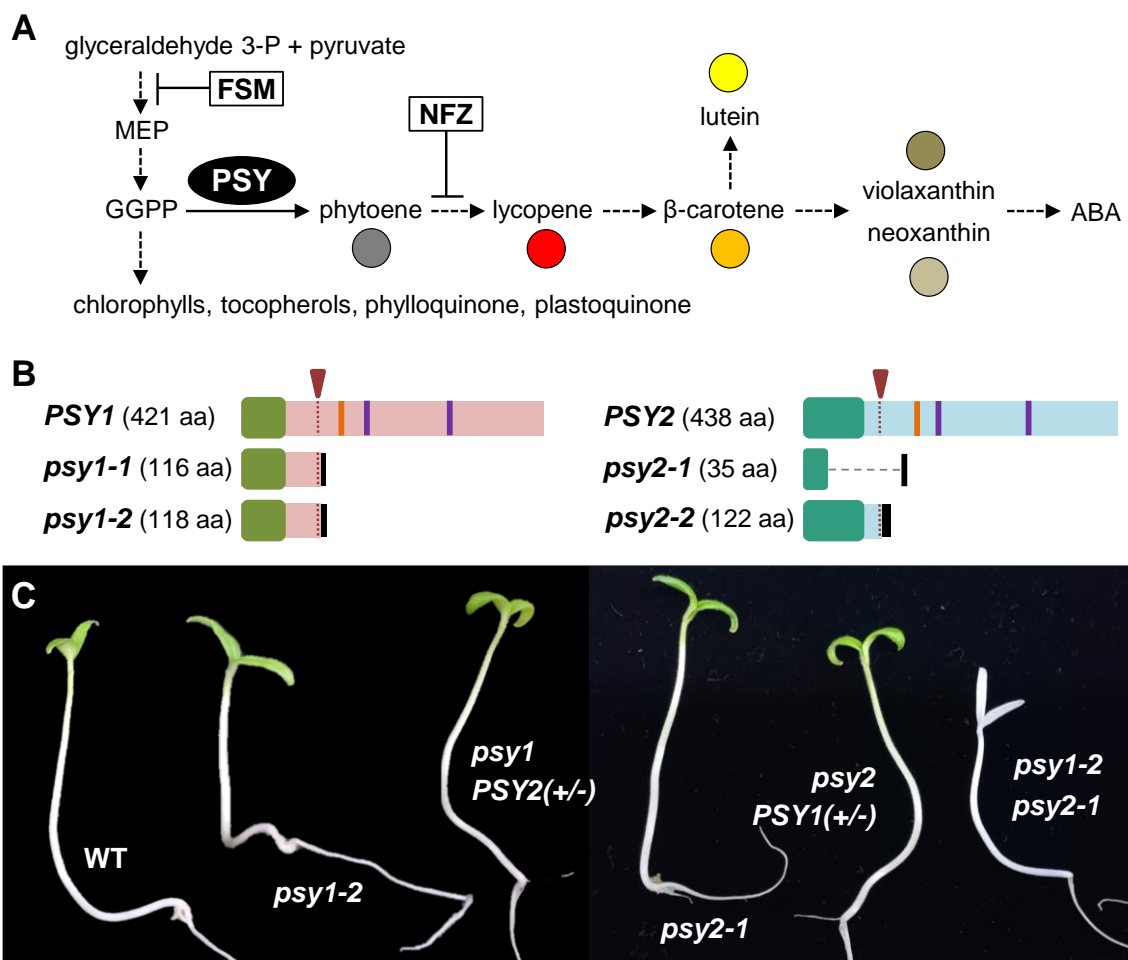

**Fig. 2. Tomato mutants defective in PSY1 or PSY2 show lower carotenoid levels under normal growth conditions. (A)** Representative images of 4-week-old plants of the indicated lines. **(B)** Total levels of carotenoids and chlorophylls in young leaves of WT and mutant plants like those shown in (A). In the carotenoid plot, colors correspond to the species shown in Fig. 1A. Mean and SD of  $n \geq 3$  independent biological replicates are shown. DW, dried weight. **(C)** Effective quantum yield of photosystem II ( $\phi$ PSII) in young leaves like those used in (B). Individual values (black dots) and well as mean and SD are shown, and they correspond to four different leaf areas from three different plants. In (B) and (C), bar letters represent statistically significant differences ( $P < 0.05$ ) among means according to post hoc Tukey's tests run when one way ANOVA detected different means.

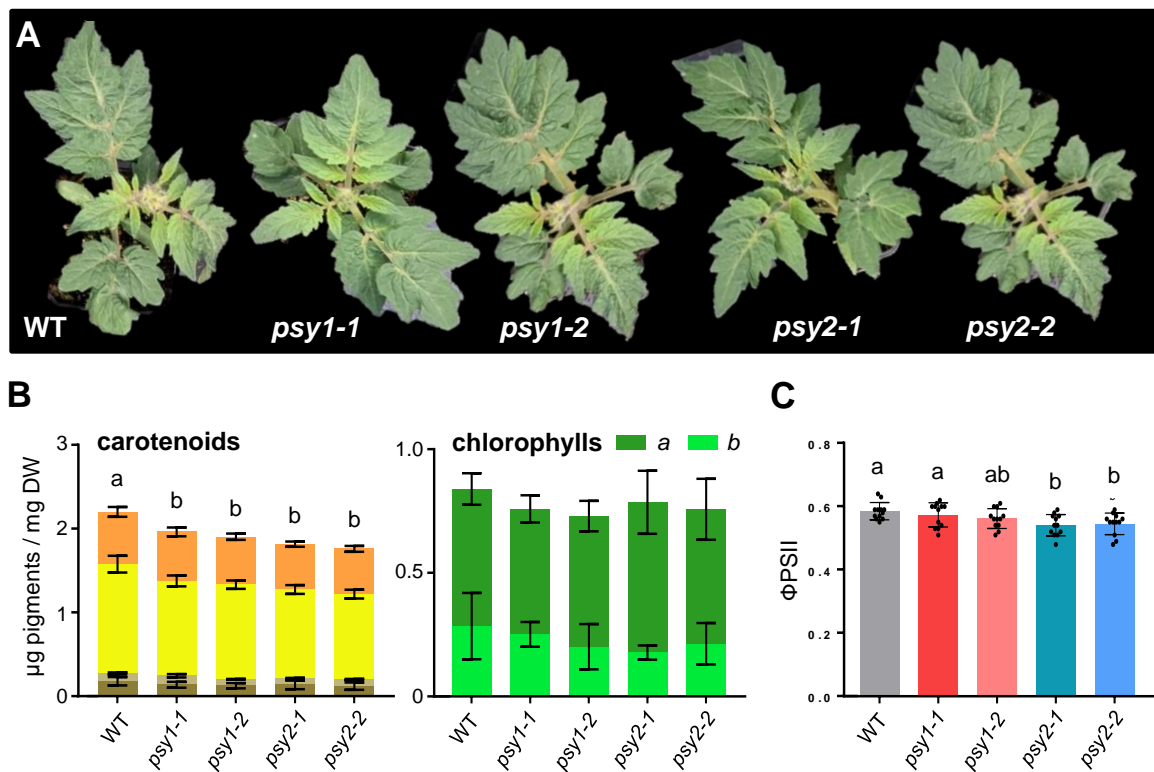

**Fig. 3. PSY2 is the main isoform required for photoprotection.** Tomato WT and mutant seedlings germinated and grown under normal light conditions were left for 5 more days under the same light conditions (NL; pale blue) or transferred to high light (HL; dark blue) for the same time. **(A)** RT-qPCR analysis of *PSY1*, *PSY2* and *PSY3* transcript levels in WT seedlings at the end of the experiment normalized using the *ACT4* gene. Data correspond to mean and SD of n=3 independent biological replicates. Asterisks indicate statistically significant differences between means relative to NL conditions (*t*-test). **(B)** Total carotenoid and chlorophyll levels in WT and mutant seedlings exposed to either NL or HL. In the carotenoid plot, colors correspond to the species shown in Fig. 1A. Mean and SD of n=3 independent biological replicates are shown. Bar letters represent statistically significant differences ( $P < 0.05$ ) among means according to post hoc Tukey's tests run when one way ANOVA detected different means. **(C)** Maximum quantum yield of photosystem II (Fv/Fm) during the indicated treatments. **(D)** Non-photochemical quenching (NPQ) values at the indicated times of exposure to either NL or HL upon increasing actinic light. In (C) and (D), values represent the mean and SD of four different leaf areas from three different seedlings and asterisks indicate statistically significant differences among means in each differential time point (one way ANOVA followed by Tukey's test). \*,  $P < 0.05$ ; \*\*,  $P < 0.01$ , \*\*\*  $P < 0.001$ ).

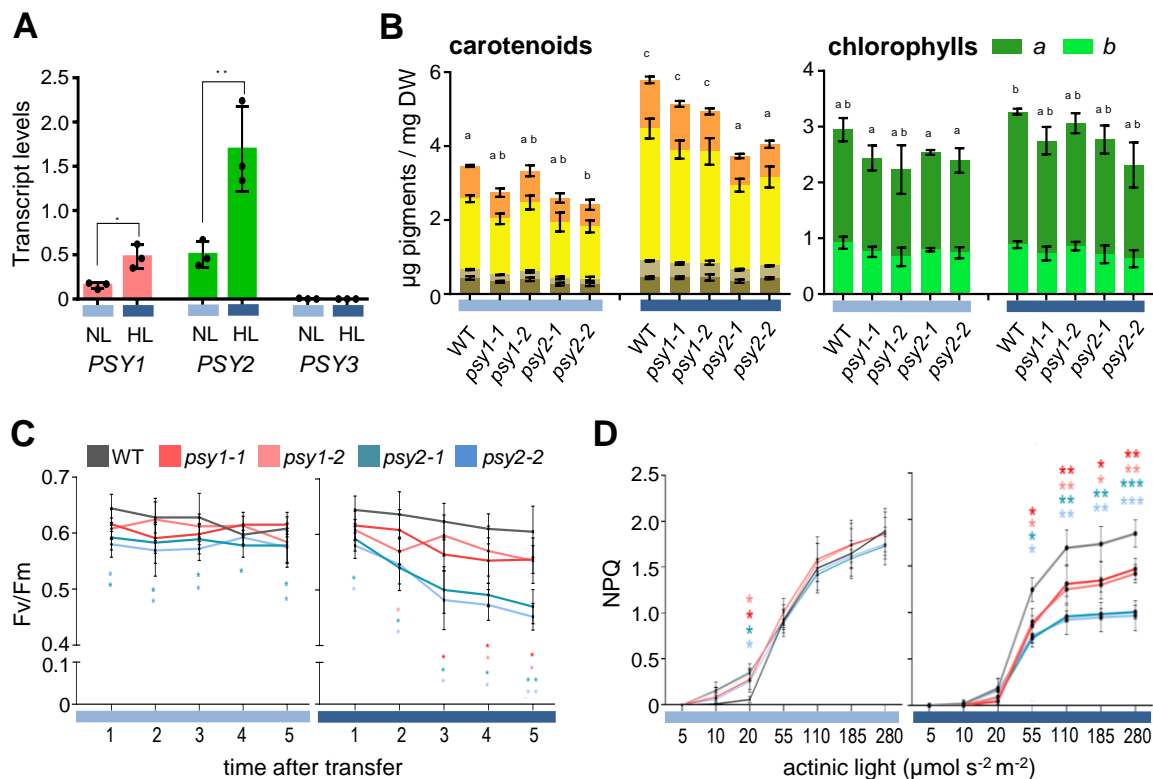

**Fig. 4. PSY1 is the main isoform contributing to carotenoid biosynthesis in petal chromoplasts. (A)** Representative images of anthesis (fully open) flowers of the indicated lines. **(B)** Total levels of free and conjugated carotenoids in petals. In the free carotenoid plot, colors correspond to the species shown in Fig. 1A. Mean and SD of  $n=3$  independent biological replicates are shown. Bar letters represent statistically significant differences ( $P < 0.05$ ) among means according to one way ANOVA followed by post hoc Tukey's tests.

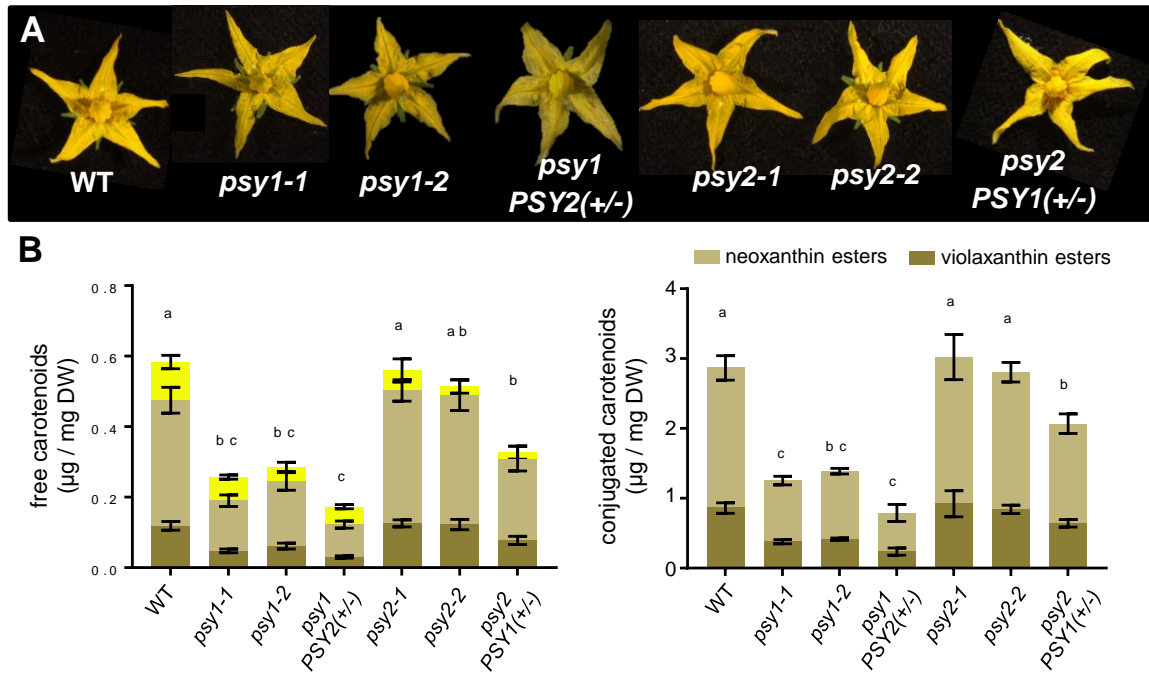

**Fig. 5. PSY1 is the main isoform contributing to carotenoid biosynthesis in fruit pericarp chromoplasts. (A)** Representative images of WT and mutant fruit collected at the breaker (B) stage and left to ripe off-vine in a controlled environment chamber for the indicated times (in days). **(B)** Total carotenoid and chlorophyll levels in WT and mutant in the pericarp of fruit collected from the plants at the MG stage. **(C)** Total carotenoid levels in WT and mutant in the pericarp of fruit collected from the plants at the B+6 stage. In the carotenoid plots, colors correspond to the species shown in Fig. 1A. In all the plots, mean and SD of  $n=3$  independent biological replicates are shown. Bar letters represent statistically significant differences ( $P < 0.05$ ) among means according to post hoc Tukey's tests run when one way ANOVA detected different means.

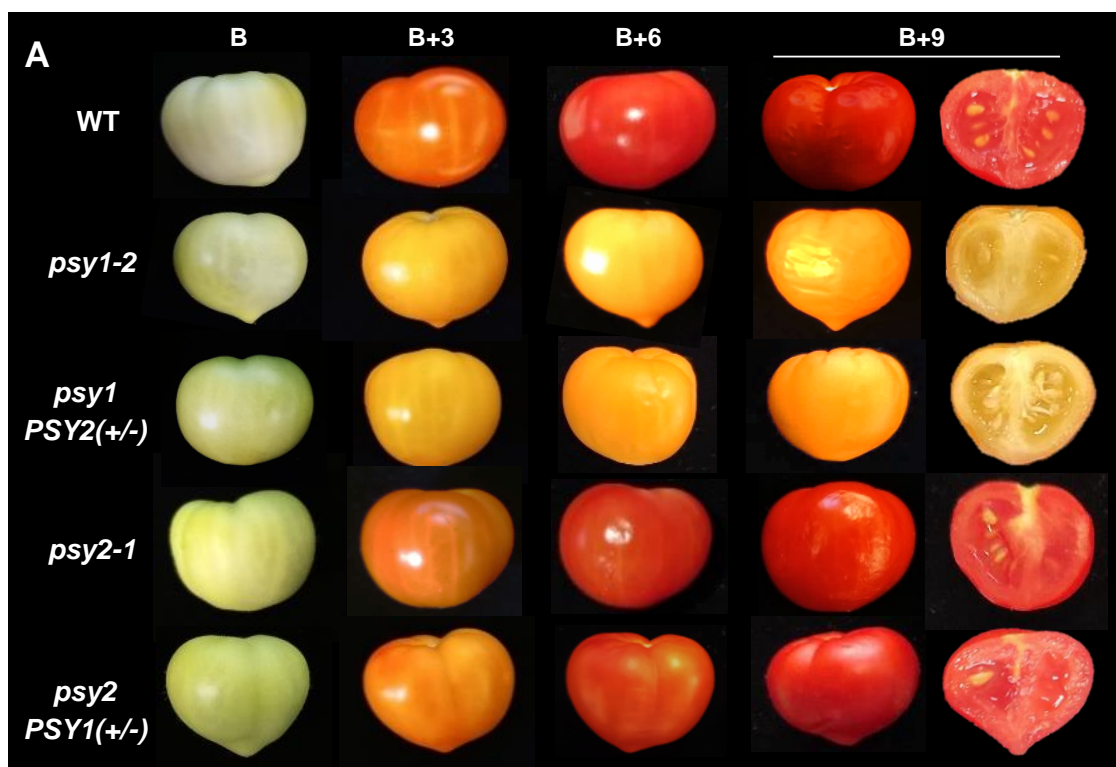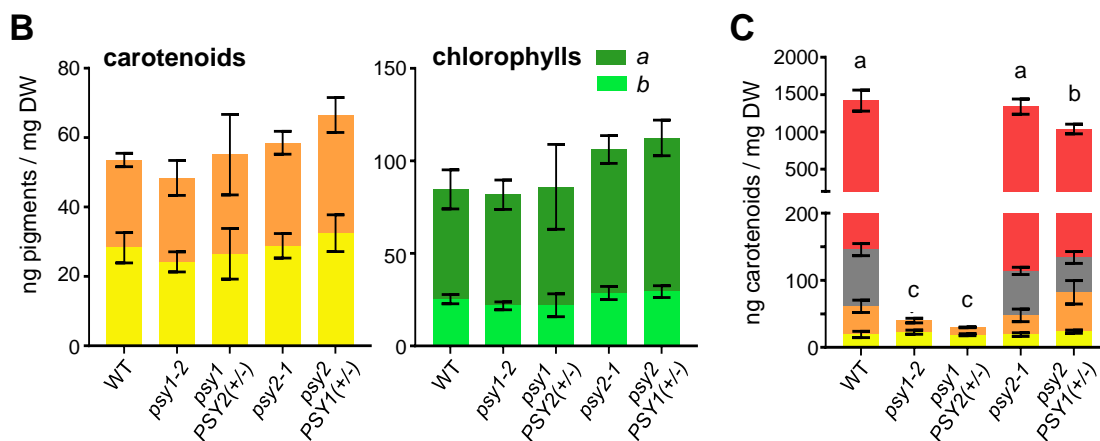



**Fig. 6. Fruit development and seed germination are differentially impacted in mutants defective in PSY1 or PSY2. (A)** Average red color quantification (arbitrary units) of fruit collected at the B stage and left to ripe off-vine in chambers for the indicated times. Values represent the mean and SD of  $n=3$  different fruits for each time point. **(B)** RT-qPCR analysis of *E8* and *ACS2* transcript levels in WT and mutant fruit collected from the plant at the indicated stage. Data correspond to mean and SD of  $n=3$  independent biological replicates. Asterisks indicate statistically significant differences relative to the WT ( $t$ -test,  $P < 0.05$ ). **(C)** Weight and volume of fully ripe fruits of the indicated genotypes. In the boxplot, the lower and upper boundary of the boxes indicate the 25th and 75th percentile, respectively; the line inside the boxes represent the median; dots mark individual data values; and whiskers above and below the boxes indicate the maximum and minimum values. In the dot plots, central line represents the mean and whiskers represent SD. Different letters represent statistically significant differences (one way ANOVA followed by Tukey's multiple comparisons test,  $P < 0.05$ ). **(D)** Kinetics of germination of WT and mutant seeds after imbibition. Error bars indicate SD of  $n=6$  biological replicates with 25 seeds each. Asterisks indicate statistically significant differences among means relative to WT samples ( $t$ -test: \*\*,  $P < 0.01$ , \*\*\*  $P < 0.001$ ).

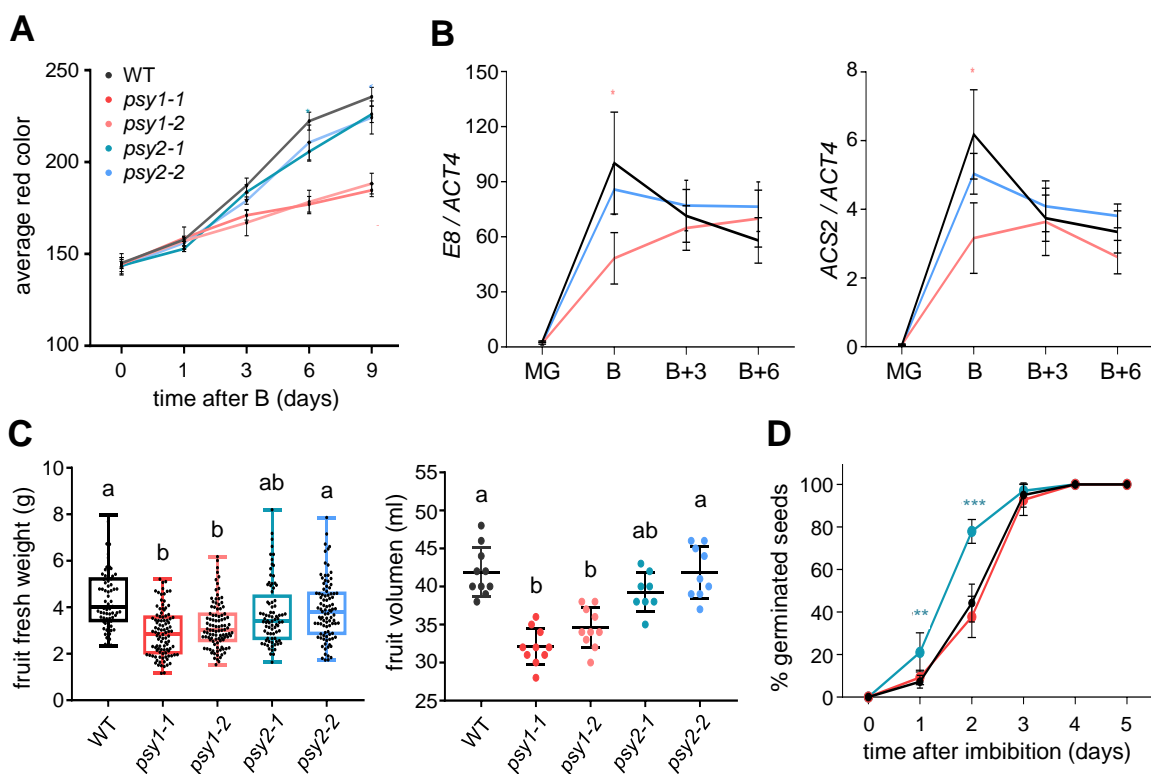

**Fig. 7. ABA levels are different in fruit pericarp and seed samples from mutants defective in PSY1 or PSY2.** Pericarp and mature seed samples were collected from ripe (B+6) fruit, whereas developing seeds were collected from immature fruits. Values correspond to the mean and SD of samples collected from  $n \geq 3$  independent fruits. Different letters represent statistically significant differences among means (one way ANOVA followed by Tukey's multiple comparisons test,  $P < 0.05$ ).

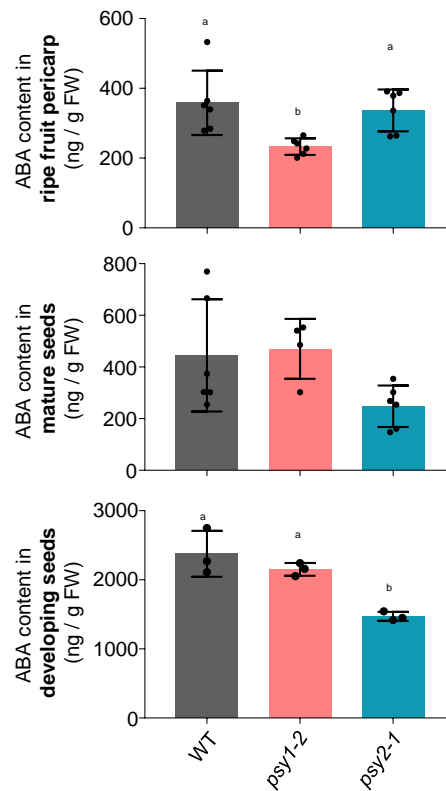

**Fig. 8. Germination of tomato seeds is regulated by ABA produced in mature seeds from PSY2-derived carotenoids. (A)** Representative images of WT and mutant fruits treated with fosmidomycin (FSM), norflurazon (NFZ) or a mock solution at the MG stage and then allowed to ripe off-vine. **(B)** Kinetics of germination of fresh seeds collected from fruits as those shown in (A) at the B+12 stage. Error bars indicate SD of n=6 biological replicates with 25 seeds each. Asterisks indicate statistically significant differences among means relative to WT samples (*t*-test: \*\*,  $P < 0.01$ , \*\*\*  $P < 0.001$ ).

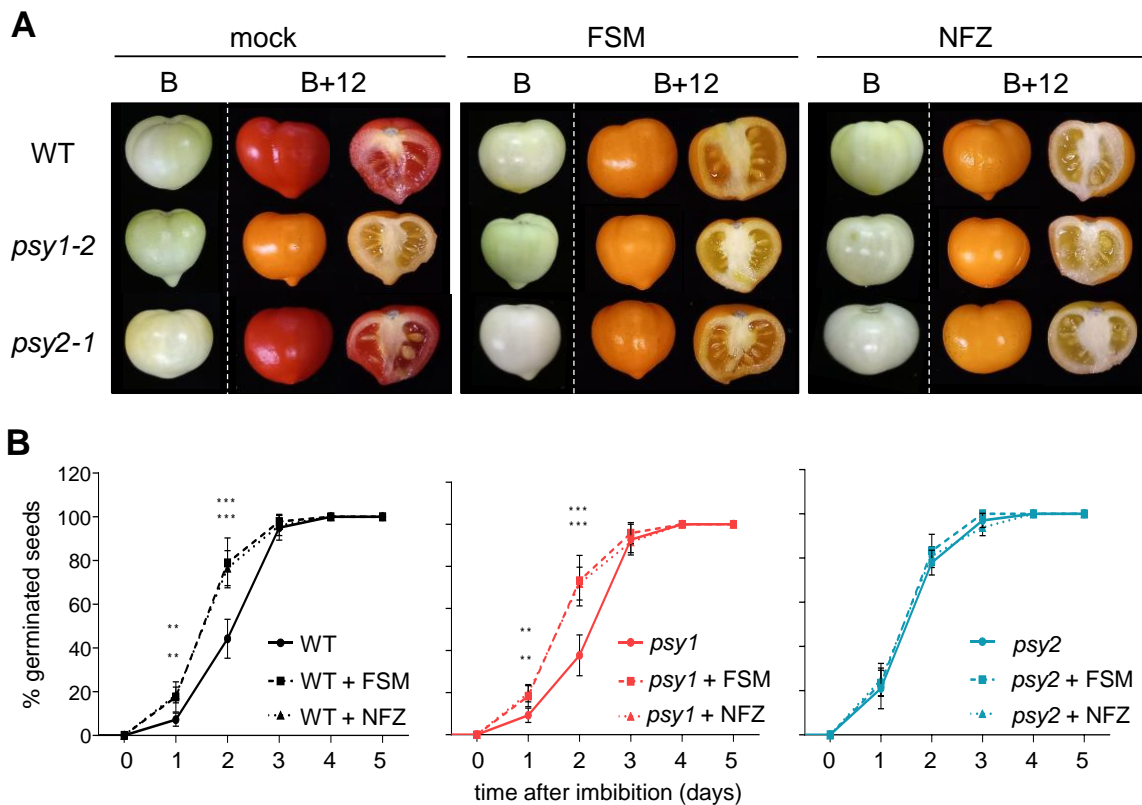

## Supplemental Figures

**Fig. S1. DNA sequence alignment of *PSY1* sequences from WT and CRISPR mutants.** Alignment was performed using Clustal Omega with default settings (<https://www.ebi.ac.uk/Tools/msa/clustalo/>). The WT sequence encoding the plastid targeting sequence is marked in green and the designed single-guide RNA (sgRNA) sequence and protospacer adjacent motif (PAM) in red. The position of genotyping primers is highlighted as arrows. Mutations are boxed in pink and translation stop codons are boxed in yellow.

```

                                PSY1gsF
PSY1      gtttttttgattcatcgaggcataggaatttgggtgtccaatgagagaatcaatagaggtg 1680
psy1-1    gtttttttgattcatcgaggcataggaatttgggtgtccaatgagagaatcaatagaggtg 1680
psy1-2    gtttttttgattcatcgaggcataggaatttgggtgtccaatgagagaatcaatagaggtg 1680
          *****

PSY1      gtggaagcaaactaataatggacggaaattttctgtacggtctgctattttggtactc 1740
psy1-1    gtggaagcaaactaataatggacggaaattttctgtacggtctgctattttggtactc 1740
psy1-2    gtggaagcaaactaataatggacggaaattttctgtacggtctgctattttggtactc 1740
          *****

PSY1      catctggagaacggacgatgacatcggaacagatgggtctatgatgtggttttgaggcagg 1800
psy1-1    catctggagaacggacgatgacatcggaacagatgggtctatgatgtggttttgaggcagg 1800
psy1-2    catctggagaacggacgatgacatcggaacagatgggtctatgatgtggttttgaggcagg 1800
          *****

                                sgRNA
PSY1      cagccttggatgaagaggcaactgagatctaccaatgagttagaagtgaagccggatatac 1860
psy1-1    cagccttggatgaagaggcaactgagatctaccaatgagttagaagtgaagccggatatac 1860
psy1-2    cagccttggatgaagaggcaactgagatctaccaatgagttagaagtgaagccggatatac 1860
          *****

                                PAM
PSY1      ctatt-ccggggaatttgggcttggttgagtgaagcatatgataggtgtggtgaagtatgt 1919
psy1-1    ctat-ccggggaatttgggcttggttgagtgaagcatatgataggtgtggtgaagtatgt 1918
psy1-2    ctatt-ccggggaatttgggcttggttgagtgaagcatatgataggtgtggtgaagtatgt 1920
          ****

PSY1      gcagagtatgcaaagacgtttaacttaggttagcttcttcaatctattcattcgtttacc 1979
psy1-1    gcagagtatgcaaagacgtttaacttaggttagcttcttcaatctattcattcgtttacc 1978
psy1-2    gcagagtatgcaaagacgtttaacttaggttagcttcttcaatctattcattcgtttacc 1980
          *****

PSY1      aaatattatttggtaagcactaattatgaatatatatatgttcatgttattgatgaagac 2039
psy1-1    aaatattatttggtaagcactaattatgaatatatatatgttcatgttattgatgaagac 2038
psy1-2    aaatattatttggtaagcactaattatgaatatatatatgttcatgttattgatgaagac 2040
          *****

PSY1      aaaatttgatctttgtttgtttattcaggaactatgctaatactgactcccgagagaagaagg 2099
psy1-1    aaaatttgatctttgtttgtttattcaggaactatgctaatactgactcccgagagaagaagg 2098
psy1-2    aaaatttgatctttgtttgtttattcaggaactatgctaatactgactcccgagagaagaagg 2100
          *****

                                PSY1gR
PSY1      gctatctgggcaatatatgggtgagggttctagccatttaataaacagttacgcgcacaaac 2159
psy1-1    gctatctgggcaatatatgggtgagggttctagccatttaataaacagttacgcgcacaaac 2158
psy1-2    gctatctgggcaatatatgggtgagggttctagccatttaataaacagttacgcgcacaaac 2160
          *****

```

**Fig. S2. DNA sequence alignment of *PSY2* sequences from WT and CRISPR mutants.** Alignment was performed using Clustal Omega with default settings (<https://www.ebi.ac.uk/Tools/msa/clustalo/>). The WT sequence encoding the plastid targeting sequence is marked in green and the designed single-guide RNA (sgRNA) sequence and protospacer adjacent motif (PAM) in red. The position of genotyping primers is highlighted as arrows. Mutations are boxed in pink and translation start and stop codons are boxed in blue and yellow, respectively.

```

                                PSY2gF
PSY2   gttgtttcagc atgtctgttgctttgttggggtgtttctccgaattccgagggtctcat 540
psy2-1 gttgtttcagc atgtctgttgctttgttggggtgtttctccgaattccgagggtctcat 540
psy2-2 gttgtttcagc atgtctgttgctttgttggggtgtttctccgaattccgagggtctcat 540
*****

PSY2   acgggacaggattcttggattcagtcgcgagaaggggaaccgggttggaaatcatccagggt 600
psy2-1 acgggacaggattcttggattcagtcgcgagaaggggaaccgggttggaaatcatccagggt 581
psy2-2 acgggacaggattcttggattcagtcgcgagaaggggaaccgggttggaaatcatccagggt 600
*****

PSY2   tcccatctcgggataggaattcgatgtggaaggaggattcaagaaaggtgggagacagg 660
psy2-1 ----- 581
psy2-2 tcccatctcgggataggaattcgatgtggaaggaggattcaagaaaggtgggagacagg 660

PSY2   ggtggaattttgggtttttaaatgcagatttgagatattcgtgtttaggaagatcaagaa 720
psy2-1 ----- 581
psy2-2 ggtggaattttgggtttttaaatgcagatttgagatattcgtgtttaggaagatcaagaa 720

PSY2   ctgagaatggaaggagttttctgtacagtctagtttggtggctagtcagctggagaaa 780
psy2-1 ----- 581
psy2-2 ctgagaatggaaggagttttctgtacagtctagtttggtggctagtcagctggagaaa 780

                                sgRNA      PAM
PSY2   tggctgtgtcatcagaaaaaaaaagtgatatgaggtggattgaagcaggcagctttagtga 840
psy2-1 ----- 581
psy2-2 tggctgtgtcatcagaaaaaaaaagtgatatgaggtggattgaagcaggcagctttagtga 838

PSY2   agaggcatctgatatctactgatgacatacaagtgaagccggatattgttcttccgggta 900
psy2-1 ----- gta 584
psy2-2 agaggcatctgatatctactgatgacatacaagtgaagccggatattgttcttccgggta 898
*****

PSY2   atttgggcttgttgagtgaagcatatgatcgttgtggcgaagtatgtgcagagtatgcaa 960
psy2-1 atttgggcttgttgagtgaagcatatgatcgttgtggcgaagtatgtgcagagtatgcaa 644
psy2-2 atttgggcttgttgagtgaagcatatgatcgttgtggcgaagtatgtgcagagtatgcaa 958
*****

PSY2   agacattttacttaggtcagtcctcaacctttgtttttatctgttctttagtttacaaaat 1020
psy2-1 agacattttacttaggtcagtcctcaacctttgtttttatctgttctttagtttacaaaat 704
psy2-2 agacattttacttaggtcagtcctcaacctttgtttttatctgttctttagtttacaaaat 1018
*****

                                PSY2gR
PSY2   cttggttaagggtatttagttgatgaagacaaaatttaaattcttttggtttcttattt 1080
psy2-1 cttggttaagggtatttagttgatgaagacaaaatttaaattcttttggtttcttattt 764
psy2-2 cttggttaagggtatttagttgatgaagacaaaatttaaattcttttggtttcttattt 1078
*****

PSY2   aggaaccatgctaataatgactccagacagaagaagagctatctgggcaatatatgggtgatgt 1140
psy2-1 aggaaccatgctaataatgactccagacagaagaagagctatctgggcaatatatgggtgatgt 824
psy2-2 aggaaccatgctaataatgactccagacagaagaagagctatctgggcaatatatgggtgatgt 1138
*****

```

**Fig. S3. Protein sequence alignment of PSY1 and PSY2 sequences from WT and CRISPR mutants.** Alignment was performed using Clustal Omega with default settings (<https://www.ebi.ac.uk/Tools/msa/clustalo/>). The WT sequences show the plastid targeting sequence marked in green and the position targeted by the designed single-guide RNA (sgRNA) sequence in red. They also show conserved domains pivotal to PSY function: hydrobolic flap (boxed in orange) and Asp-rich domains (boxed in purple). The sequence present in the different alleles as a consequence of their respective mutations is underlined. Translation stop codons are boxed in yellow.

|        |                                                                                                                 |     |
|--------|-----------------------------------------------------------------------------------------------------------------|-----|
| PSY1   | <b>MSVALLWVVSPCDVSNGT</b> <b>SFMESVREGNRF</b> <b>FDSSRHRNLVSNERINRGGGKQTNNGRKFS</b>                             | 60  |
| psy1-1 | MSVALLWVVSPCDVSNGT <b>S</b> FMESVREGNRF <b>FDSSRHRNLVSNERINRGGGKQTNNGRKFS</b>                                   | 60  |
| psy1-2 | MSVALLWVVSPCDVSNGT <b>S</b> FMESVREGNRF <b>FDSSRHRNLVSNERINRGGGKQTNNGRKFS</b>                                   | 60  |
| PSY1   | <b>VR</b> SAILATPSGERTMTSEQMVYDVVLRQAALVKRQLRSTNELEV <b>KPDIPIP</b> GNLGLLSEA                                   | 120 |
| psy1-1 | VRSAILATPSGERTMTSEQMVYDVVLRQAALVKRQLRSTNELEV <b>KPDIPI</b> <u>IRGIWAC*</u> ---                                  | 116 |
| psy1-2 | VRSAILATPSGERTMTSEQMVYDVVLRQAALVKRQLRSTNELEV <b>KPDIPI</b> <u>SGEFGGLVE*</u> -                                  | 118 |
| PSY1   | YDRCGEVCAE <b>YAKTF</b> NLGTMLMTPERRRAIWAIYVWCRR <b>DELVD</b> GPNASYITPAALDRW                                   | 180 |
| psy1-1 | -----                                                                                                           | 116 |
| psy1-2 | -----                                                                                                           | 118 |
| PSY1   | ENRLEDVFNGRPFDMLDGALSDTVSNFPVDIQPFPRDMIEGMRMDLRKSRYKNFDELYLYC                                                   | 240 |
| psy1-1 | -----                                                                                                           | 116 |
| psy1-2 | -----                                                                                                           | 118 |
| PSY1   | YYVAGTVGLMSVPIMGIAPESKATTESVYNAALALGIANQLTNI <b>LRDVGED</b> DARRGRVYLP                                          | 300 |
| psy1-1 | -----                                                                                                           | 116 |
| psy1-2 | -----                                                                                                           | 118 |
| PSY1   | QDELAQAGLSDEDIFAGRVTDKWRI <b>F</b> MKKQIHRARKFFDEAEKGVTELSASRFPVWASL                                            | 360 |
| psy1-1 | -----                                                                                                           | 116 |
| psy1-2 | -----                                                                                                           | 118 |
| PSY1   | VLYRKILDEIEANDYNNFTKRAYVSKSKLI <b>ALPIAYAKSLVPPTKTAQR*</b>                                                      | 412 |
| psy1-1 | -----                                                                                                           | 116 |
| psy1-2 | -----                                                                                                           | 118 |
| PSY2   | <b>MSVALLWVVSPNSEVSYGTGFLDSV</b> REGN <b>R</b> GLE <b>SSRFP</b> SRDRNS <b>MWKG</b> F <b>KKGGRQ</b> GW <b>NF</b> | 60  |
| psy2-1 | MSVALLWVVSPNSEVSYGTGFLDSVREGN <b>R</b> VI <b>WAC*</b> -----                                                     | 35  |
| psy2-2 | MSVALLWVVSPNSEVSYGTGFLDSVREGN <b>R</b> GLE <b>SSRFP</b> SRDRNS <b>MWKG</b> F <b>KKGGRQ</b> GW <b>NF</b>         | 60  |
| PSY2   | <b>GFLNADL</b> RYS <b>CLGRSRTENGRS</b> F <b>SVQ</b> SSLVASPAGEMAVSSEK <b>VYEVVLKQ</b> AALVKRHL                  | 120 |
| psy2-1 | -----                                                                                                           | 35  |
| psy2-2 | GFLNADL <b>RYSCLGRSRTENGRS</b> F <b>SVQ</b> SSLVASPAGEMAVSSEK <b>VYEVVL</b> LAGS <b>FSEEASD</b>                 | 120 |
| PSY2   | ISTDDIQVKPDIVLPGNLGLLSEAYDRCGEVCAE <b>YAKTF</b> YLGTMMLTPDRRRAIWAIYVW                                           | 180 |
| psy2-1 | -----                                                                                                           | 35  |
| psy2-2 | <u>IY*</u> -----                                                                                                | 122 |
| PSY2   | CRRT <b>DELVD</b> GPNASHITPQALDRWEARLEDIFNGRPFDM <b>LD</b> AALSDTVSRFPVDIQPF <b>RD</b>                          | 240 |
| psy2-1 | -----                                                                                                           | 35  |
| psy2-2 | -----                                                                                                           | 122 |
| PSY2   | MVEGMRMDLWKSRYNNFDELYLYCYVAGTVGLMSVPIMGIAPESKATTESVYNAALALG                                                     | 300 |
| psy2-1 | -----                                                                                                           | 35  |
| psy2-2 | -----                                                                                                           | 122 |
| PSY2   | IANQLTNI <b>LRDVGED</b> DARRGRVYLPQDELAQAGLSDEDIFAGKVTDKWRI <b>F</b> MKKQI <b>R</b> ARK                         | 360 |
| psy2-1 | -----                                                                                                           | 35  |
| psy2-2 | -----                                                                                                           | 122 |
| PSY2   | FFDEAEKGVTELSASRWPVLASLLLYRKILDEIEANDYNNF <b>TRRAYVSKPKLL</b> TLPIA                                             | 420 |
| psy2-1 | -----                                                                                                           | 35  |
| psy2-2 | -----                                                                                                           | 122 |
| PSY2   | YARSLVPPKSTSS <b>PLAKT*</b>                                                                                     | 438 |
| psy2-1 | -----                                                                                                           | 35  |
| psy2-2 | -----                                                                                                           | 122 |



**Fig. S4. Representative phenotypes of tomato mutants defective in PSY1 or PSY2.** The upper picture shows WT and *psy1-2* flowers in anthesis. The picture below shows representative ripe fruits from the indicated genotypes. The plots show the result of RT-qPCR analysis of *PSY1*, *PSY2* and *PSY3* transcript levels in pericarp tissue from WT and mutant fruit collected from the plant at MG (green bar) and ripe (B+6, red bar) stages. Individual values after normalization with the *ACT4* gene are shown together with the mean and SD of n=3 independent biological replicates.

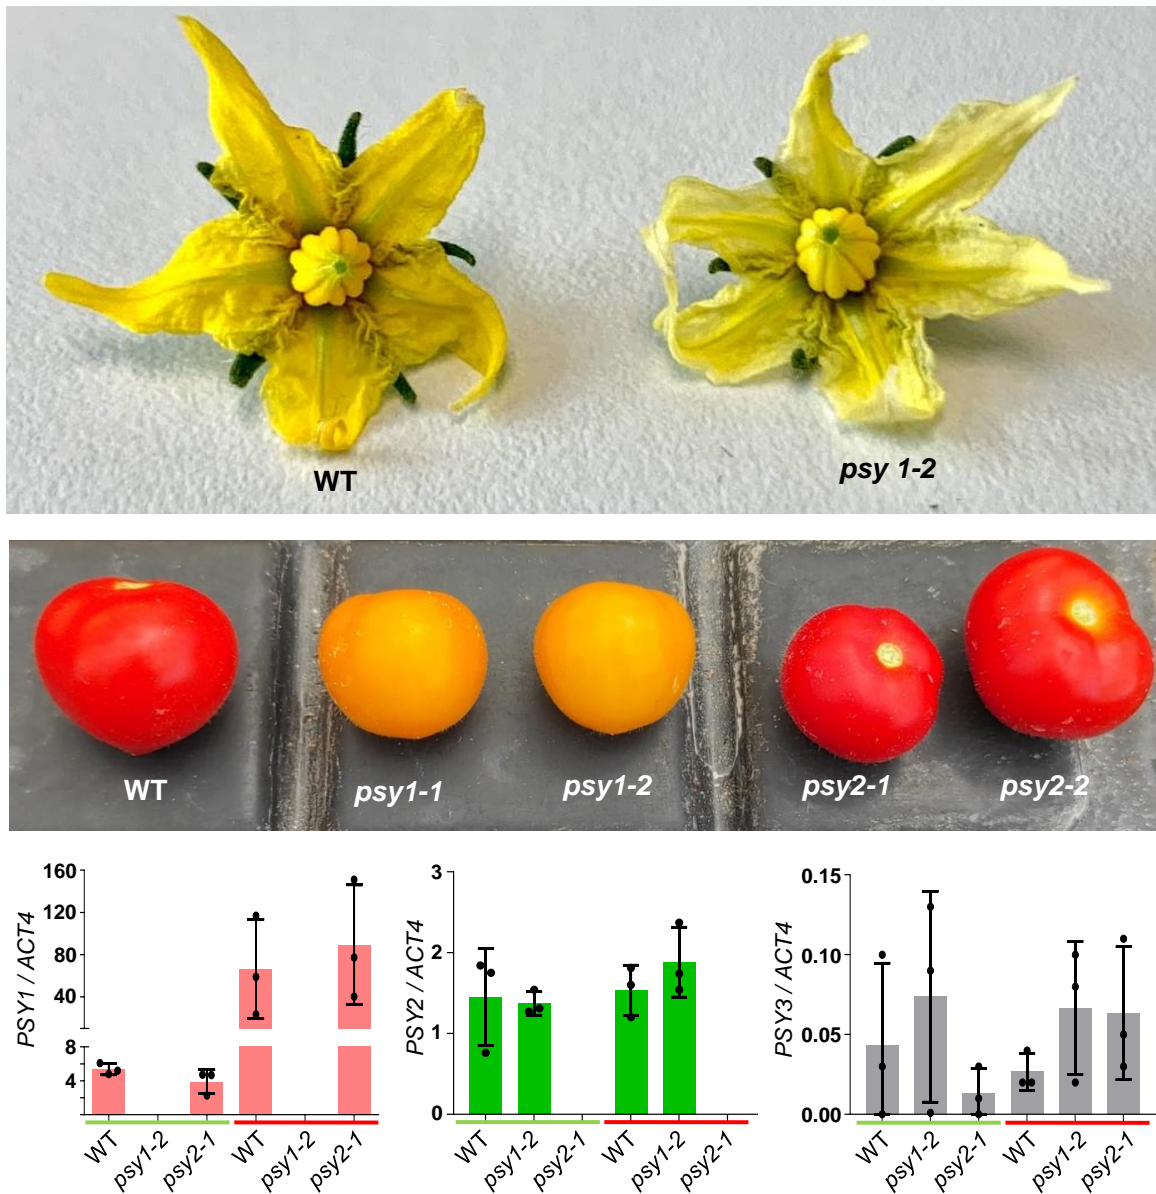

**Figure S5. PCR genotyping of mutant alleles.** The schemes representing the WT PSY1 and PSY2 proteins and the mutant versions generated in this work are described in Fig. 1B. Arrows represent the position of primers for genotyping. Agarose gel analysis of the results for the indicated genotypes resulting from the cross of *psy1-2* and *psy2-1* plants are shown.

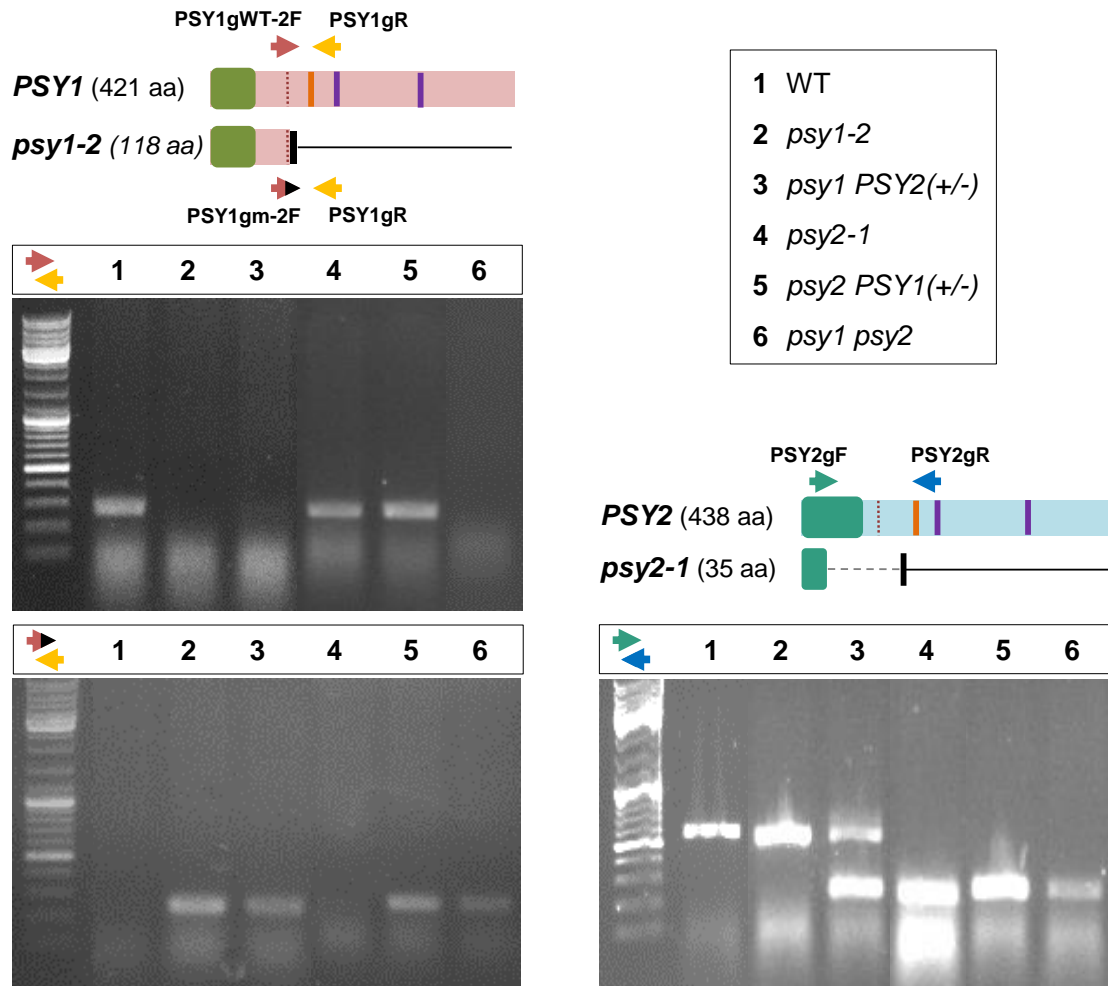

**Figure S6. *PSY1*, *PSY2* and *PSY3* transcript levels in different tissues.** Plots represent RNAseq data obtained from Genevestigator (<https://genevestigator.com>). Transcript levels are represented as log<sub>2</sub> TPM (transcripts per million mapped reads). DPA, days post-anthesis; MG, mature green; B, breaker.

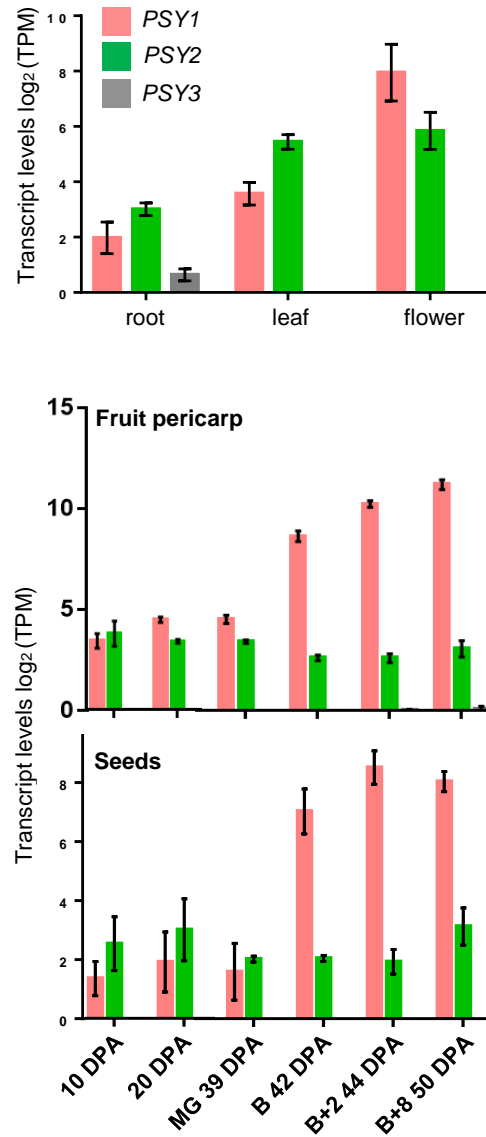

**Figure S7. Expression profile of *PSY1* and *PSY2* in the fruit pericarp during development.** Data were retrieved from the Tomato Expression Atlas' expression viewer ([https://tea.solgenomics.net/expression\\_viewer/input](https://tea.solgenomics.net/expression_viewer/input)). DPA, days post-anthesis; MG, mature green.

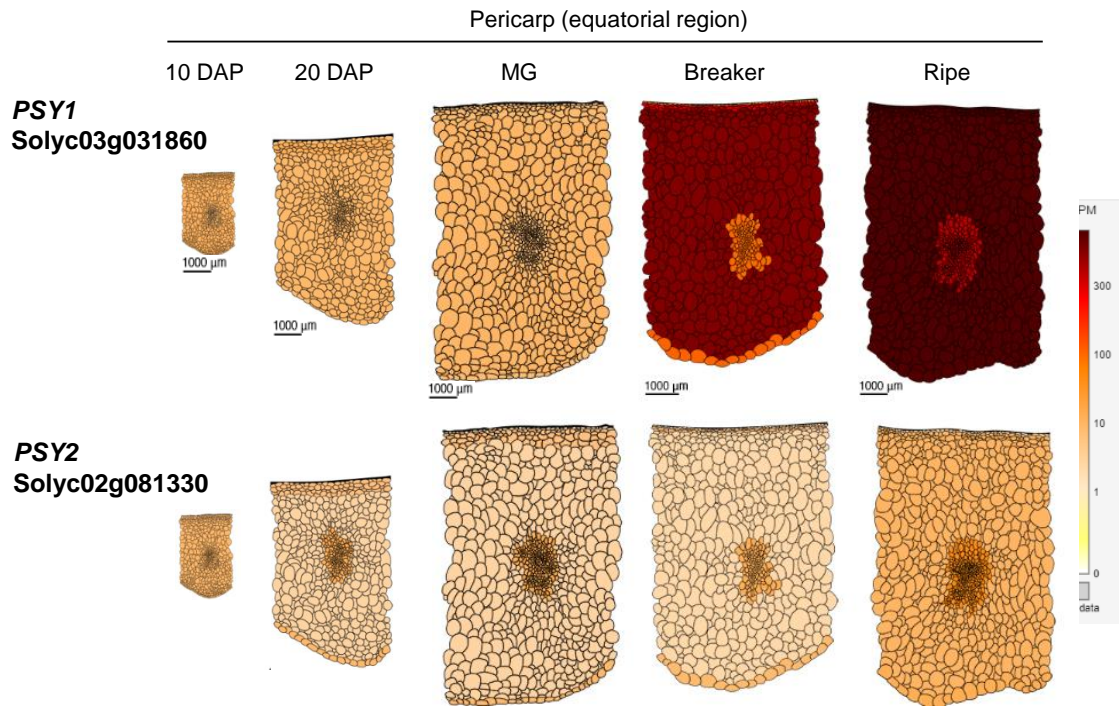

**Figure S8. Expression profile of ABA biosynthetic genes in developing seeds.** Data were retrieved from the Tomato eFP Browser ([http://bar.utoronto.ca/efp\\_tomato/cgi-bin/efpWeb.cgi](http://bar.utoronto.ca/efp_tomato/cgi-bin/efpWeb.cgi)). DAF, days after flowering; MG, mature green; B, breaker. A schematic ABA biosynthesis pathway is also shown.

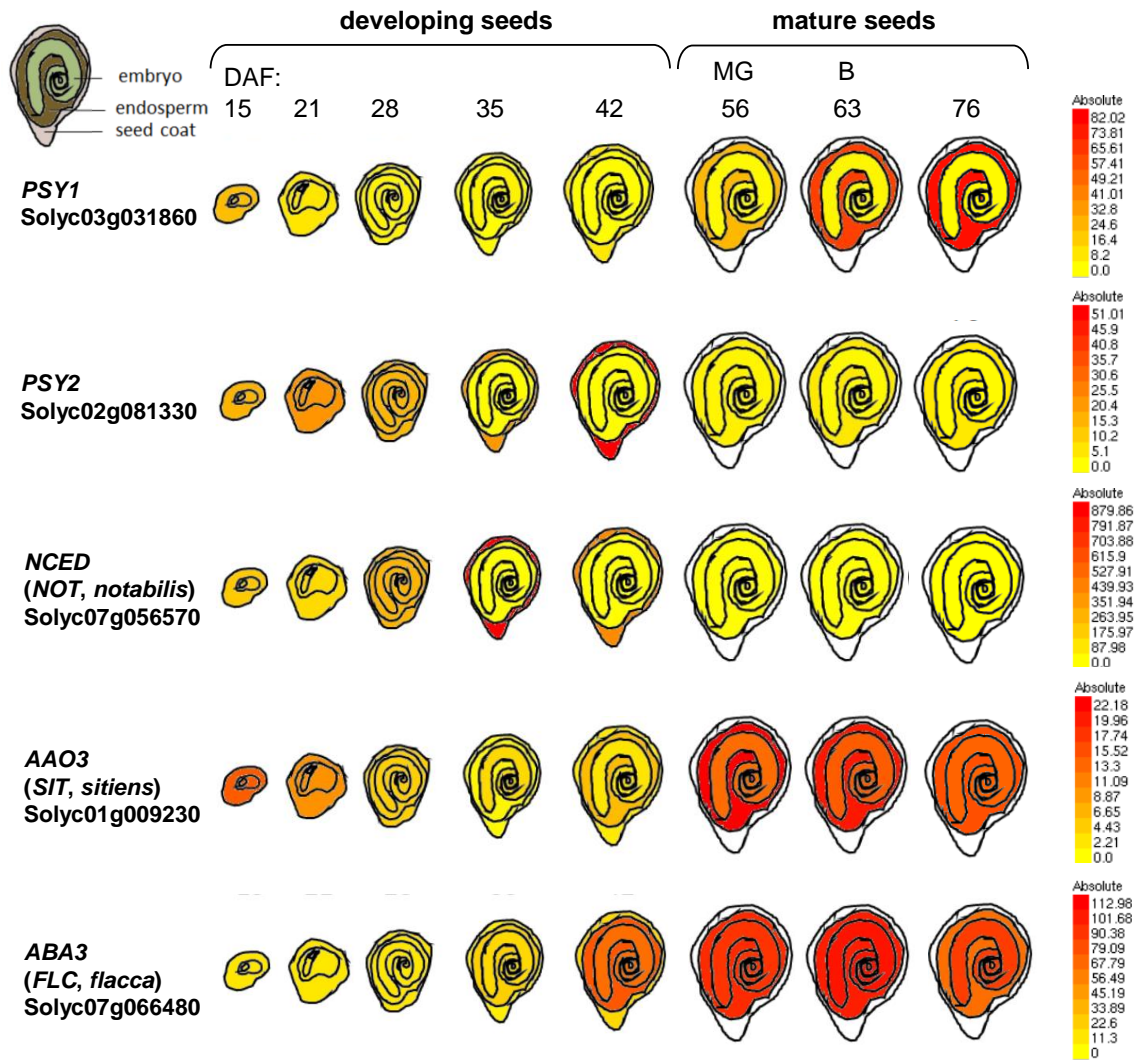



## Supplemental Tables

**Table S1. Primers used in this work.**

| Use                                    | #  | Name        | Sequence (5'-3') <sup>1</sup> |
|----------------------------------------|----|-------------|-------------------------------|
| sgRNAs for CRISPR-Cas9 gene impairment | 1  | PSY1sgRNA-F | ATTGAGCCGGATATACCTATTCCG      |
|                                        | 2  | PSY1sgRNA-R | AAACCGGAATAGGTATATCCGGCT      |
|                                        | 3  | PSY2sgRNA-F | ATTGGTATGAGGTGGTATTGAAGC      |
|                                        | 4  | PSY2sgRNA-R | AAACGCTTCAATACCACCTCATAC      |
| RT-qPCR                                | 5  | PSY1-qF     | ACAGGCAGGTCTATCCGATG          |
|                                        | 6  | PSY1-qR     | ACGCCTTTCTCTGCCTCATC          |
|                                        | 7  | PSY2-qF     | CAGGGCTCTCCGATGAAGAC          |
|                                        | 8  | PSY2-qR     | CACCGGCCATCTACTAGCAG          |
|                                        | 9  | PSY3-qF     | TTGGATGCAATAGAGGAGAATG        |
|                                        | 10 | PSY3-qR     | ATTGAATGGCTAAACTAGGCAAAG      |
|                                        | 11 | ACT4-qF     | CCTTCCACATGCCATTCTCC          |
|                                        | 12 | ACT4-qR     | CCACGCTCGGTCAGGATCT           |
| CRISPR plants genotyping               | 13 | PSY1gsF     | CGAGGCATAGGAATTTGGTG          |
|                                        | 14 | PSY1gWT-1F  | GTGAAGCCGGATATACCTATT         |
|                                        | 15 | PSY1gm-1F   | GTGAAGCCGGATATACCTATC         |
|                                        | 16 | PSY1gWT-2F  | GTGAAGCCGGATATACCTATTC        |
|                                        | 17 | PSY1gm-2F   | GTGAAGCCGGATATACCTATTT        |
|                                        | 18 | PSY1gR      | CCATATATTGCCCAGATAGC          |
|                                        | 19 | PSY2gF      | GGGTTGTTTCTCCGAATTCCG         |
|                                        | 20 | PSY2gR      | GCATGGTTCCTAAATAAGAACC        |
|                                        | 21 | Cas9F       | TCCCTCATCAGATCCACCTC          |
|                                        | 22 | Cas9R       | CTGAAACGTGAGCCTTCTGG          |
|                                        | 23 | NTPIIF      | GAAGGGGATAGAAGGCGA            |
|                                        | 24 | NTPIIR      | AGATGGATTGCACGCAGG            |



**Table S2. CRISPR-Cas9 constructs and cloning details.**

| Construct                   | Template                             | Primers | Sequence cloned*                                    | Cloning method                                                            | Entry plasmid                        | Destiny plasmid |
|-----------------------------|--------------------------------------|---------|-----------------------------------------------------|---------------------------------------------------------------------------|--------------------------------------|-----------------|
| <i>pEN-PSY1(sg1)</i>        | -                                    | 1 + 2   | PSY1 <sub>1849-1868</sub>                           | <i>BbsI</i> / T4 ligase                                                   | <i>pENC1.1</i>                       | -               |
| <i>pEN-PSY2(sg2)</i>        | -                                    | 3 + 4   | PSY2 <sub>806-825</sub>                             | <i>BbsI</i> / T4 ligase                                                   | <i>pENC1.1</i>                       | -               |
| <i>pDE-PSY1,2 (sg1+sg2)</i> | <i>pEN-PSY1(sg1) + pEN-PSY2(sg2)</i> | -       | PSY1 <sub>1849-1868</sub> + PSY2 <sub>806-825</sub> | PSY1(sg1) <i>MluI</i> +<br><i>Bsu36I</i> / T4 ligase<br>PSY2(sg2) Gateway | <i>pEN-PSY1(sg1) + pEN-PSY2(sg2)</i> | <i>pDE-Cas9</i> |

\* Numbers indicate the first and last nucleotide positions in the genomic DNA (see Fig. S1 for PSY1 and Fig. S2 for PSY2)
